# Supplementary material for: Strong metal-support interaction promoted scalable production of thermally stable single-atom catalysts
Source: PubMed Central journal article supplement (PMC7062790; doi:10.1038/s41467-020-14984-9), 2020-03-09
Supplement: 41467_2020_14984_MOESM1_ESM.pdf [file 41467_2020_14984_MOESM1_ESM.pdf]

Strong metal-support interaction promoted scalable production of  
thermally stable single-atom catalysts

Liu et al.

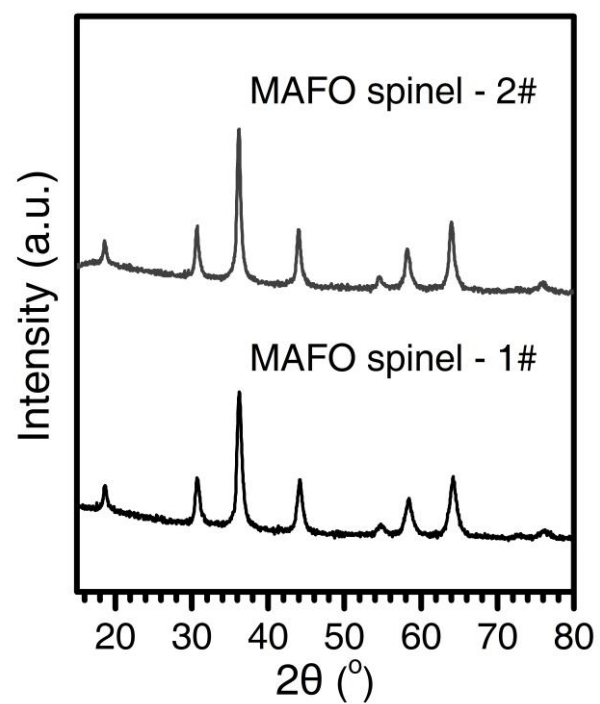

**Supplementary Figure 1. XRD patterns of two batches of MAFO spinel.**

As shown in Supplementary Fig. 1, the materials had pure spinel crystal phase, indicating Fe element was uniformly incorporated into the spinel. And the reproducibility of the preparation method was good.

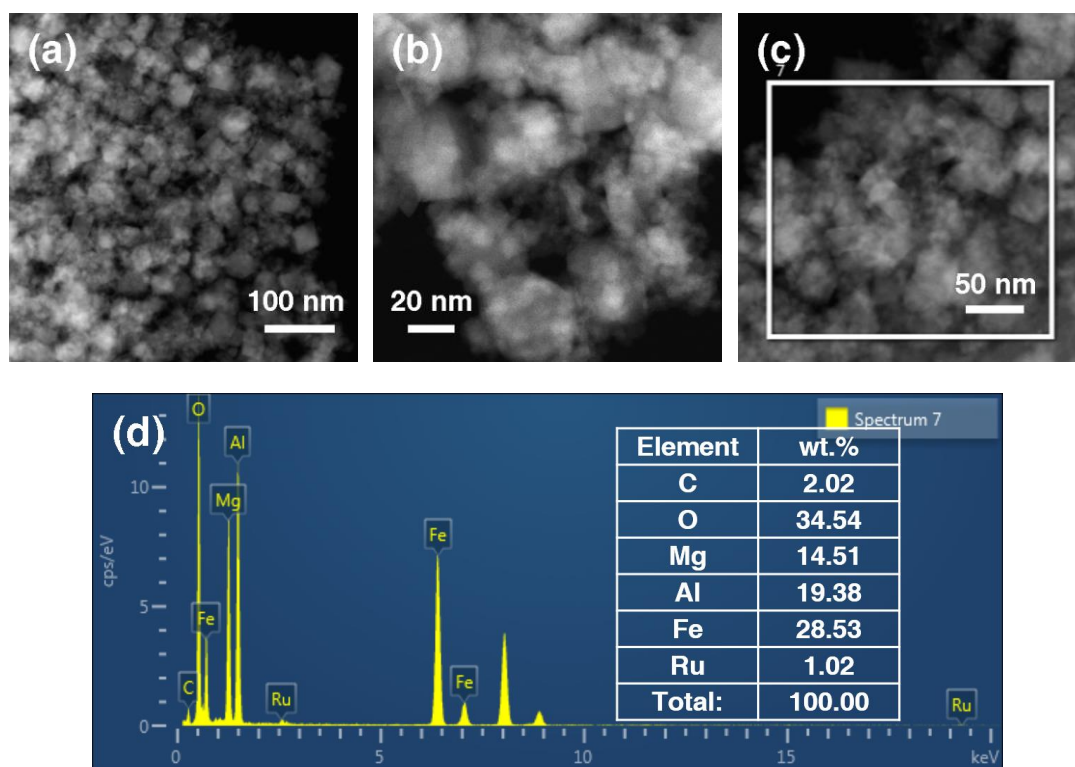

**Supplementary Figure 2. HAADF-STEM characterization of Ru/MAFO-IWI-UC sample.**

HAADF-STEM images of Ru/MAFO-IWI-UC sample (a-c) and corresponding weight percent of C, O, Mg, Al, Fe, Ru in the selected area of image (c) by energy dispersive X-ray analysis (d).

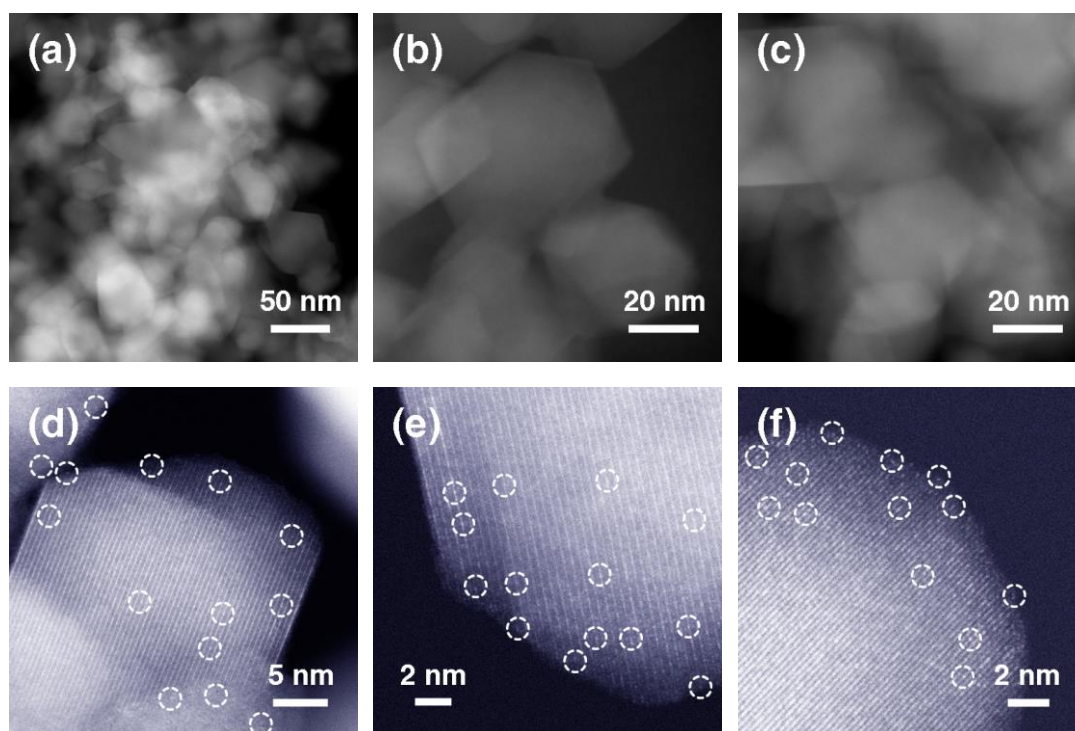

**Supplementary Figure 3. HAADF-STEM images of Ru/MAFO-IWI-900 sample.**

HAADF-STEM images (a-c) and AC-HAADF-STEM images (d-f) of Ru/MAFO-IWI-900 sample.

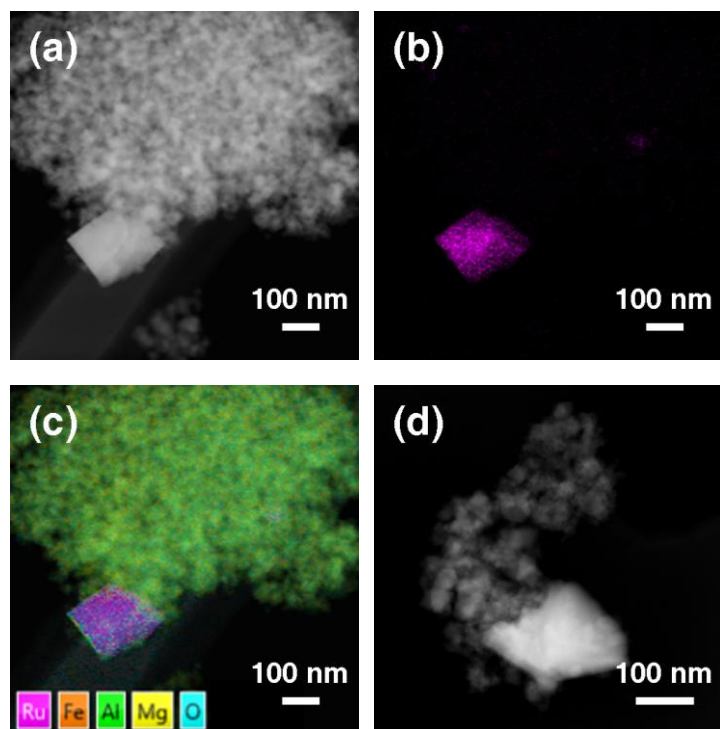

**Supplementary Figure 4. HAADF-STEM characterization of Ru/MAFO-IWI-500 sample.**

HAADF-STEM images of Ru/MAFO-IWI-500 sample (a, d) and corresponding energy dispersive X-ray spectroscopy element mapping images of Ru (b) and Ru + Fe + Al + Mg + O (c) of image (a).

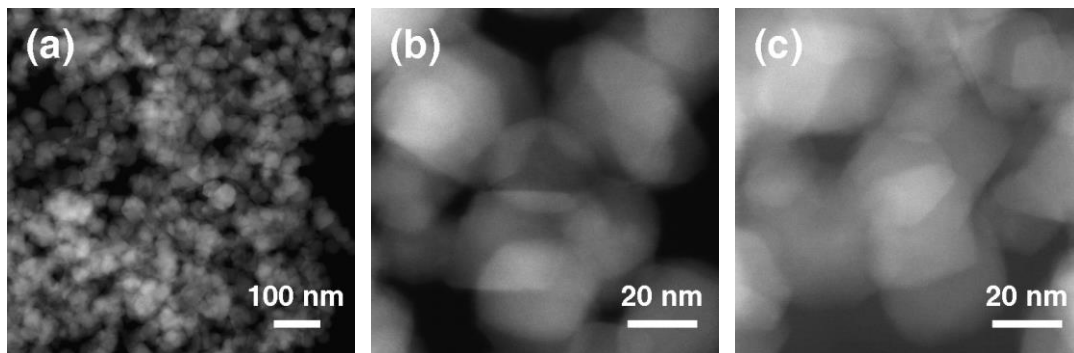

**Supplementary Figure 5. HAADF-STEM images of Ru/MAFO-IWI-500-900 sample.**

HAADF-STEM images of Ru/MAFO-IWI-500-900 sample with relatively low magnification (a) and relatively high magnifications (b, c).

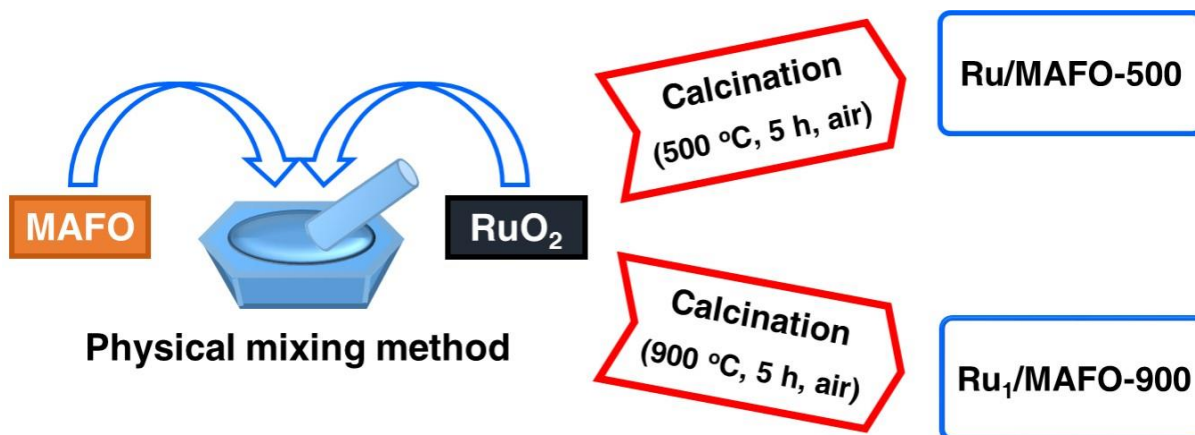

**Supplementary Figure 6. Schematic illustration of the preparation of Ru/MAFO samples.**

The Ru/MAFO samples were prepared by physical mixing (PM) method and calcined at at either 500 °C for 5 h in air (designated as Ru/MAFO-500) or 900 °C (designated as Ru<sub>1</sub>/MAFO-900).

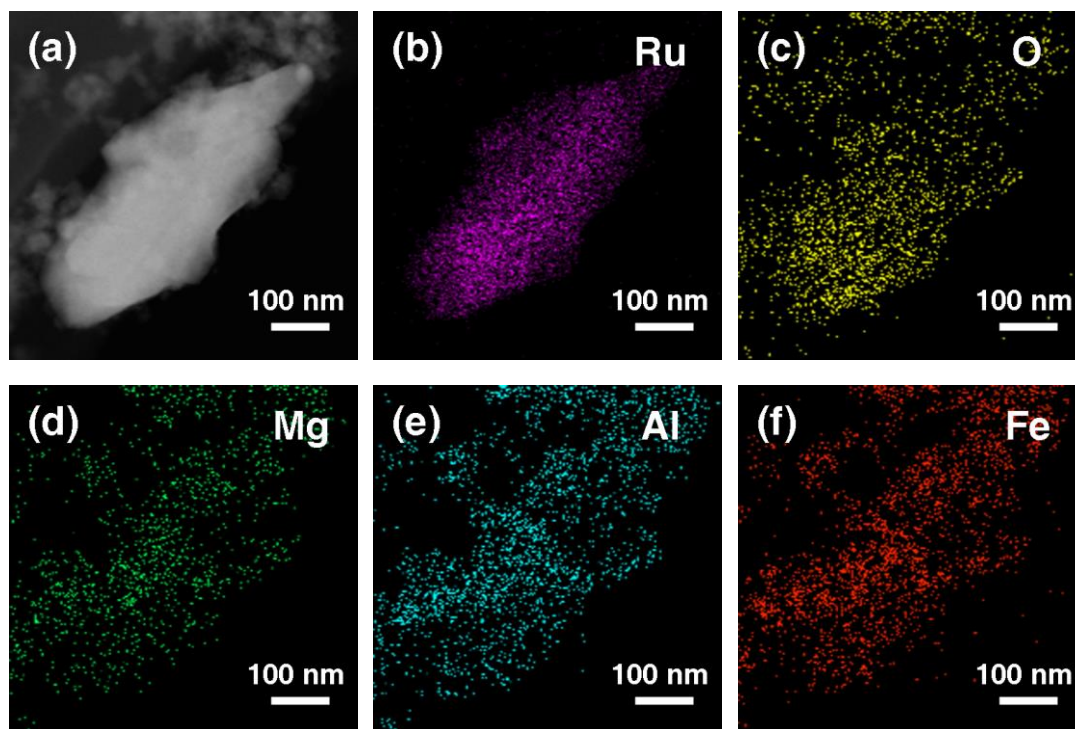

**Supplementary Figure 7. HAADF-STEM characterization of Ru/MAFO-500 sample.**

HAADF-STEM images of Ru/MAFO-500 sample (a) and corresponding energy dispersive X-ray spectroscopy element mapping images of Ru (b), O (c), Mg (d), Al (e) and Fe (f).



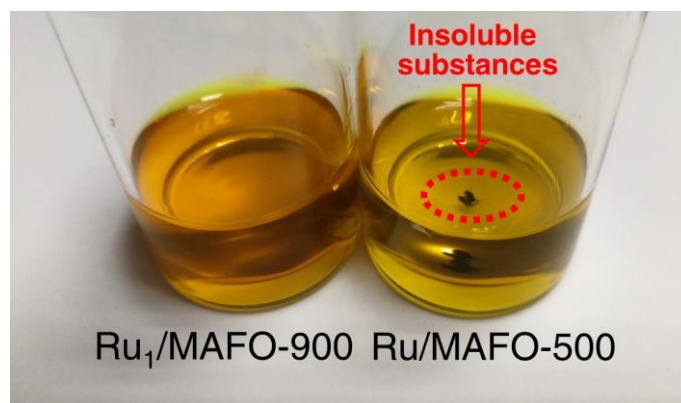

**Supplementary Figure 8. Photograph of aqua regia solution of Ru/MAFO-500 and Ru<sub>1</sub>/MAFO-900 samples after being heated on a hotplate for 2 h.**

For Ru<sub>1</sub>/MAFO-900 sample, Ru species could be completely dissolved. On the contrary, some black insoluble substances remained in Ru/MAFO-500 sample which were undispersed RuO<sub>2</sub> aggregates.

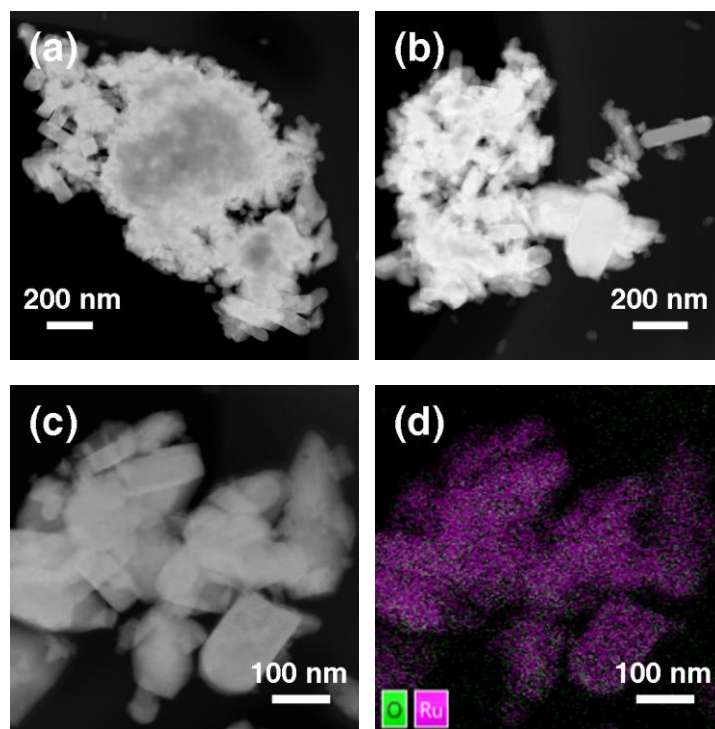

**Supplementary Figure 9. HAADF-STEM characterization of RuO<sub>2</sub> powders.**

HAADF-STEM images of commercial RuO<sub>2</sub> powders (a-c) and corresponding energy dispersive X-ray spectroscopy element mapping image (d).

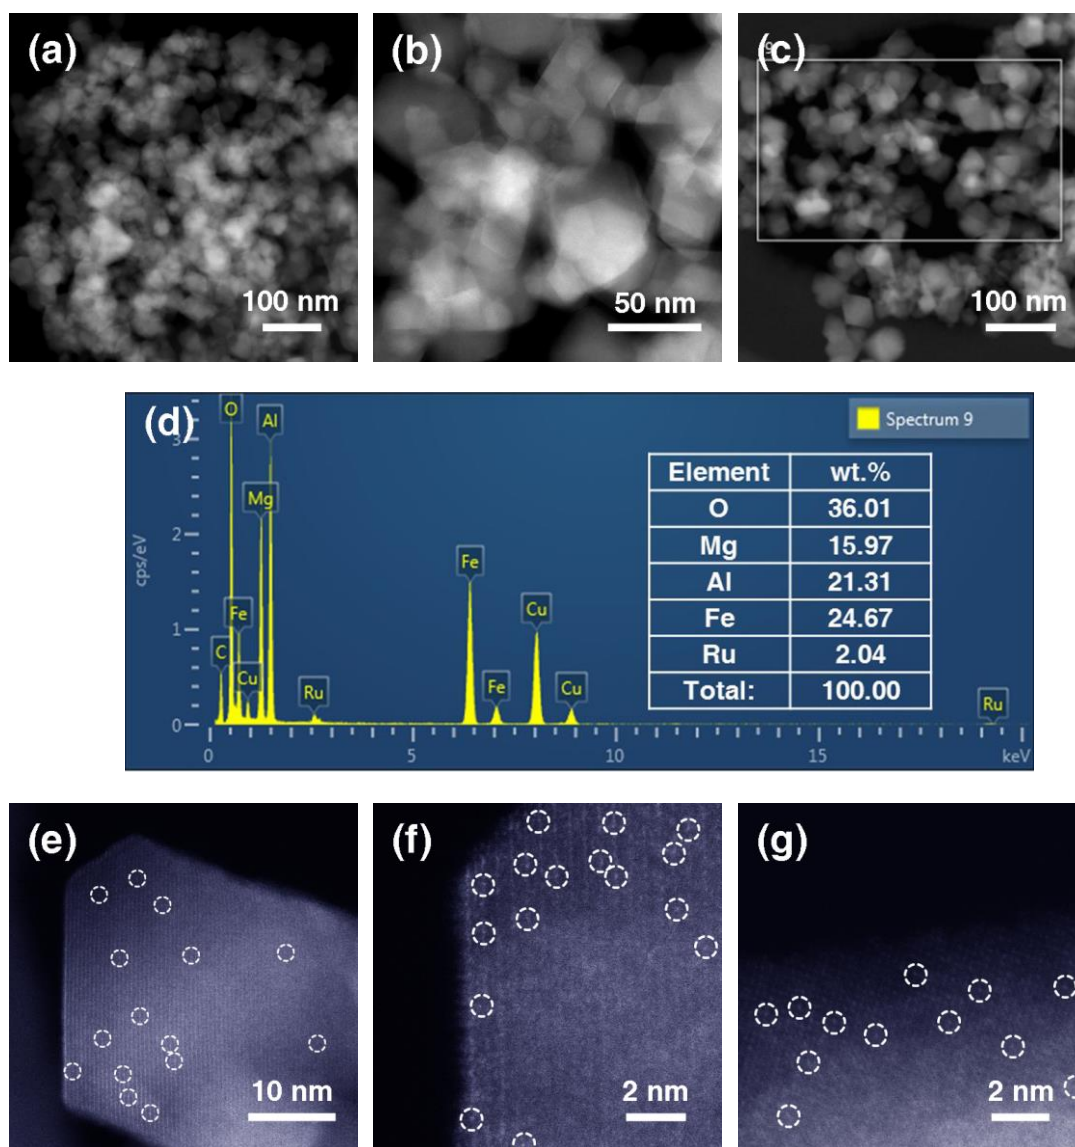

**Supplementary Figure 10. HAADF-STEM characterization of Ru<sub>1</sub>/MAFO-900 sample.**

HAADF-STEM images of Ru<sub>1</sub>/MAFO-900 sample (a-c) and corresponding weight percent of O, Mg, Al, Fe, Ru in the selected area of image (c) by energy dispersive X-ray analysis (d). And AC-HAADF-STEM images of Ru<sub>1</sub>/MAFO-900 sample (e-g).

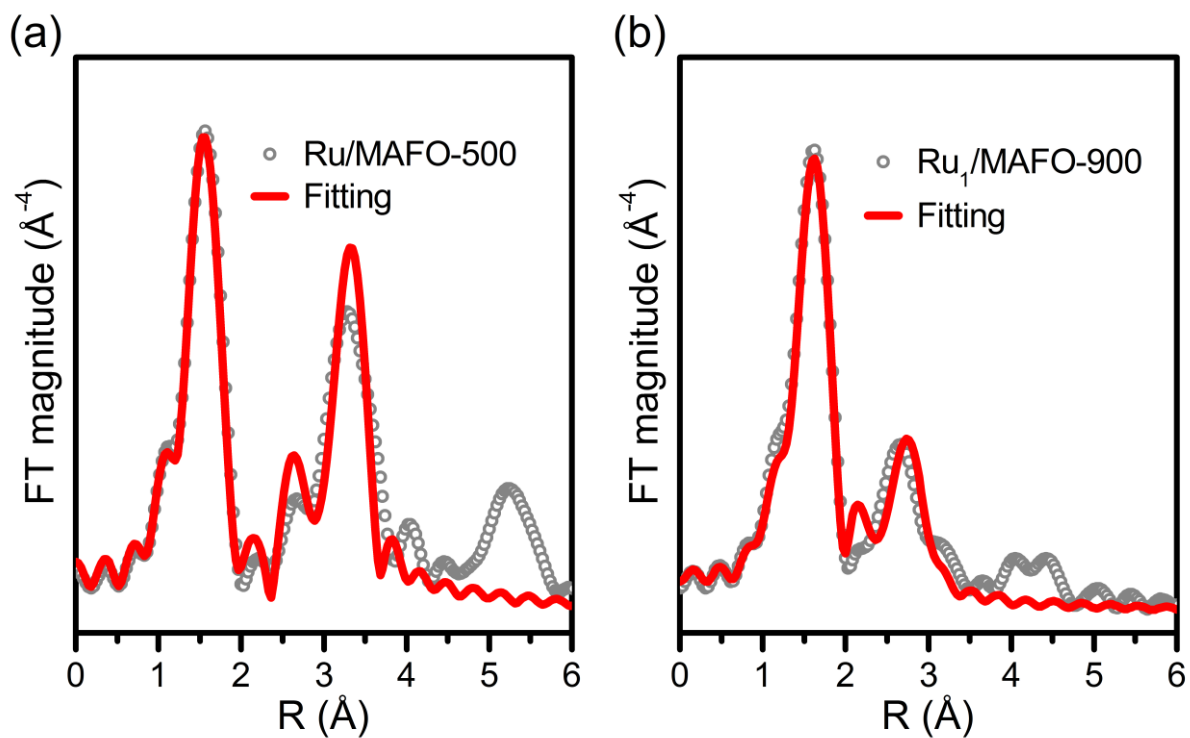

**Supplementary Figure 11. EXAFS characterization of Ru/MAFO samples.**

Experimental and fitted Fourier transforms at Ru K-edge EXAFS of Ru/MAFO-500 (a) and Ru<sub>1</sub>/MAFO-900 (b) samples.

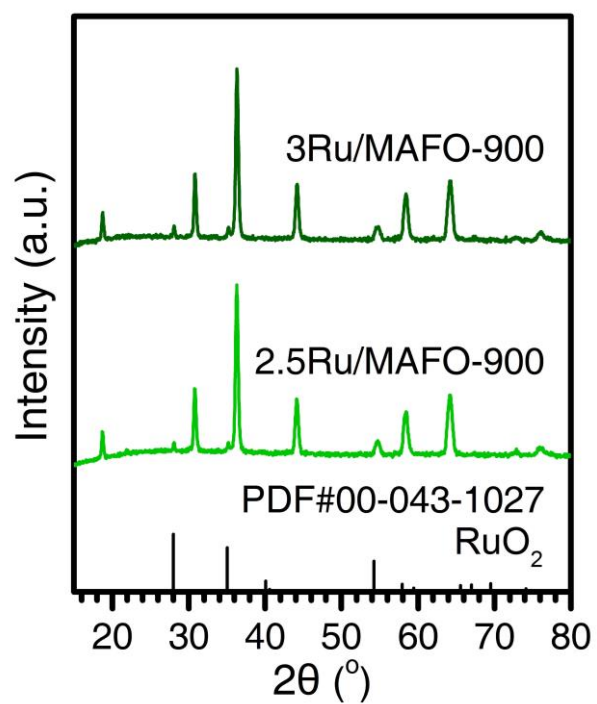

**Supplementary Figure 12. XRD patterns of 2.5/3Ru/MAFO-900 samples.**

Obvious RuO<sub>2</sub> diffraction peaks were observed for both 2.5Ru/MAFO-900 and 3Ru/MAFO-900 samples, indicating that the maximum Ru loading is in fact around 2 wt%.

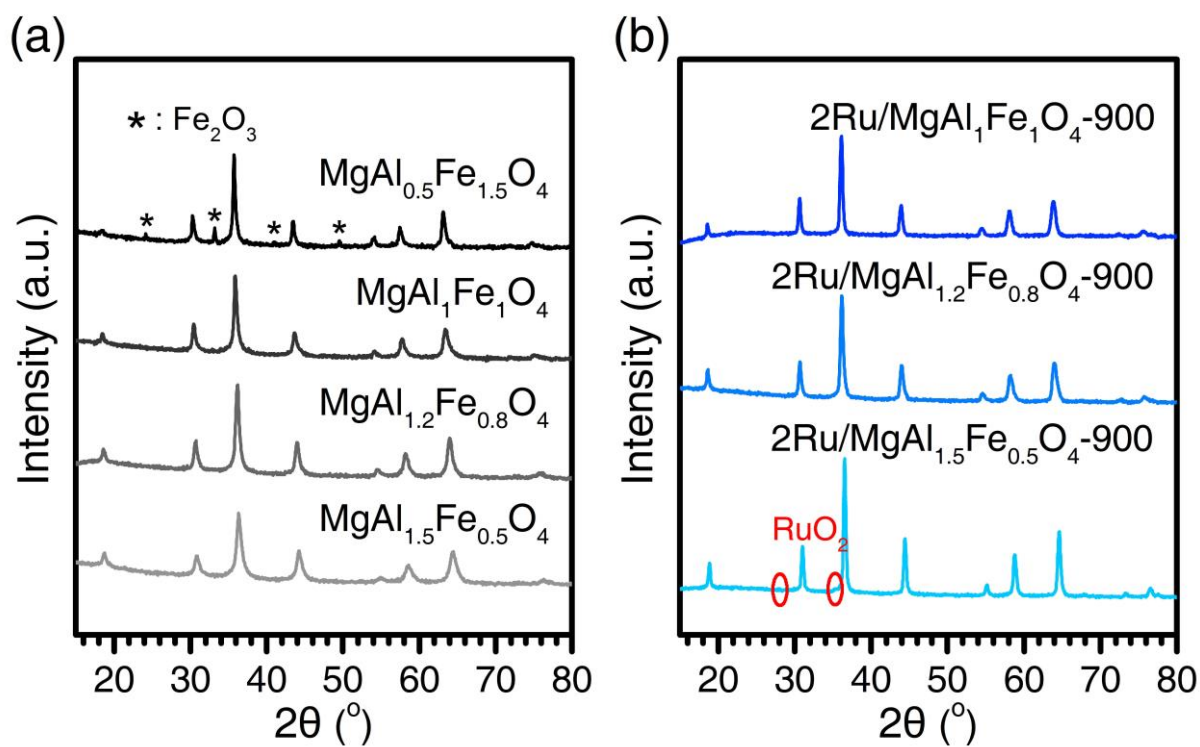

**Supplementary Figure 13. XRD patterns of spinels and 2Ru/spinel-900 samples.**

XRD patterns of  $\text{MgAl}_{2-x}\text{Fe}_x\text{O}_4$  ( $x = 0.5, 0.8, 1, 1.5$ ) spinels (a) and  $2\text{Ru}/\text{MgAl}_{2-x}\text{Fe}_x\text{O}_4-900$  ( $x = 0.5, 0.8, 1$ ) samples (b).

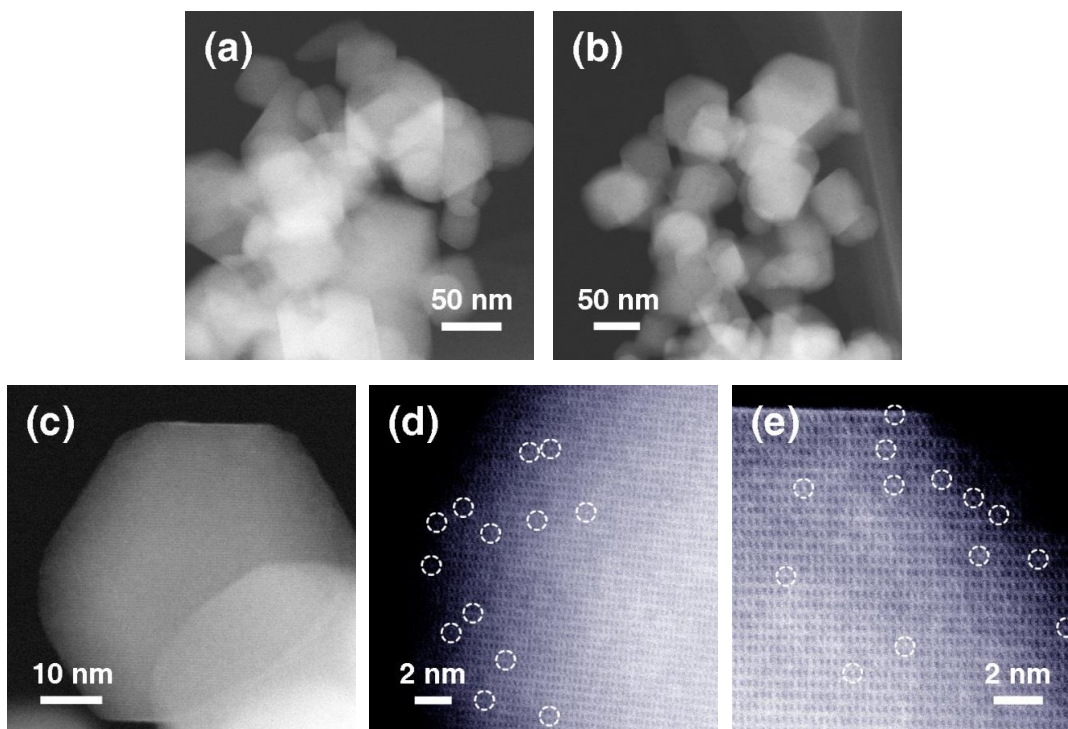

**Supplementary Figure 14. AC-HAADF-STEM images of 2Ru/MgAl<sub>1</sub>Fe<sub>1</sub>O<sub>4</sub>-900 sample.**

AC-HAADF-STEM images of 2Ru/MgAl<sub>1</sub>Fe<sub>1</sub>O<sub>4</sub>-900 sample with relatively low magnifications (a, b) and relatively high magnifications (c-e).

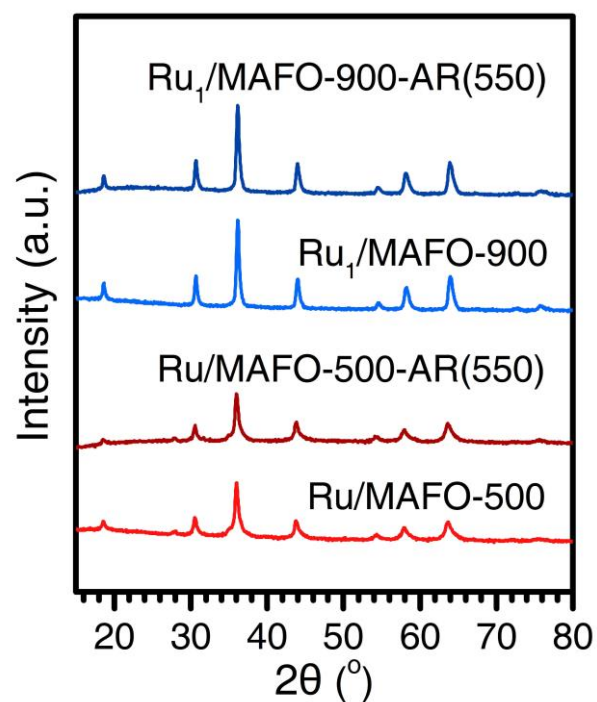

**Supplementary Figure 15. XRD patterns of Ru/MAFO-500 and Ru<sub>1</sub>/MAFO-900 samples before and after 100 h on-stream test at 550 °C.**

After the long-term N<sub>2</sub>O decomposition test at 550 °C for 100 h, the samples are designated as Ru/MAFO-500-AR(550) and Ru<sub>1</sub>/MAFO-900-AR(550), AR = after reaction. No RuO<sub>2</sub> diffraction peaks were observed for Ru<sub>1</sub>/MAFO-900-AR(550) sample.



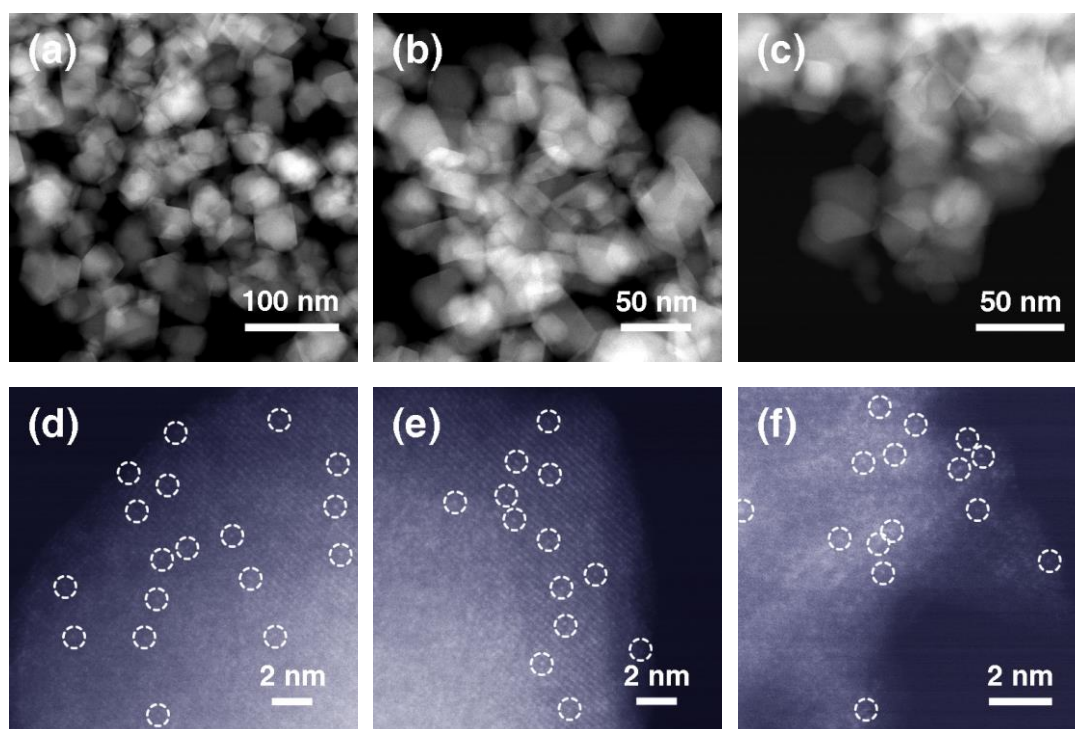

**Supplementary Figure 16. HAADF-STEM images of the used Ru<sub>1</sub>/MAFO-900 sample.**

HAADF-STEM images (a, b) and AC-HAADF-STEM images (c-f) of the used Ru<sub>1</sub>/MAFO-900 (Ru<sub>1</sub>/MAFO-900-AR(550)) sample.

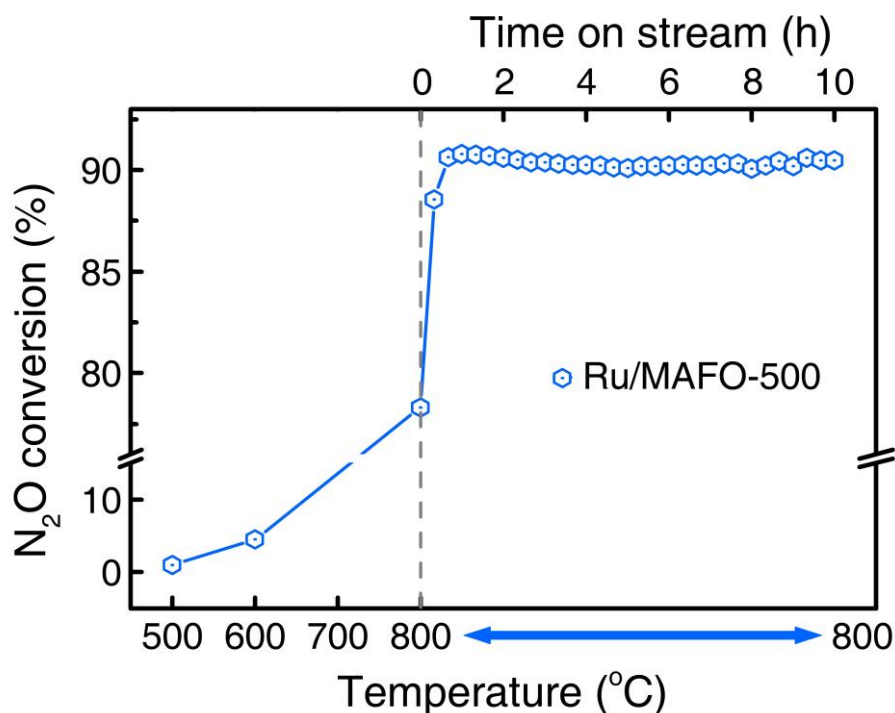

**Supplementary Figure 17. The catalytic performance of N<sub>2</sub>O decomposition on Ru/MAFO-500 sample.**

The reaction temperature increased from room temperature to 800 °C with a rate of 10 °C min<sup>-1</sup> then maintained at 800 °C for 10 h. Reaction conditions: 20 vol% N<sub>2</sub>O, Ar balance; 50 mg catalyst; gas flow, 166.7 mL min<sup>-1</sup>; GHSV = 200000 mL g<sub>cat</sub><sup>-1</sup>h<sup>-1</sup>. Decomposition of high N<sub>2</sub>O concentration at elevated temperatures (800 °C) over Ru/MAFO-500 resulted in a step-change in conversion after only a few minutes on-stream.

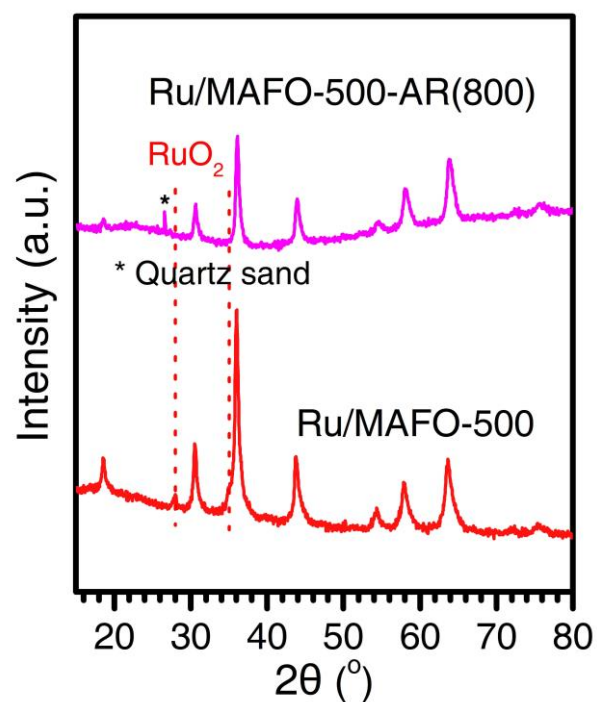

**Supplementary Figure 18. XRD patterns of Ru/MAFO-500-AR(800) and Ru/MAFO-500 samples.**

After the N<sub>2</sub>O decomposition test at 800 °C for 10 h, the used Ru/MAFO-500 sample is designated as Ru/MAFO-500-AR(800), AR = after reaction. The obvious RuO<sub>2</sub> diffraction peaks in Ru/MAFO-500 sample disappeared after the reaction of N<sub>2</sub>O decomposition at high temperature.

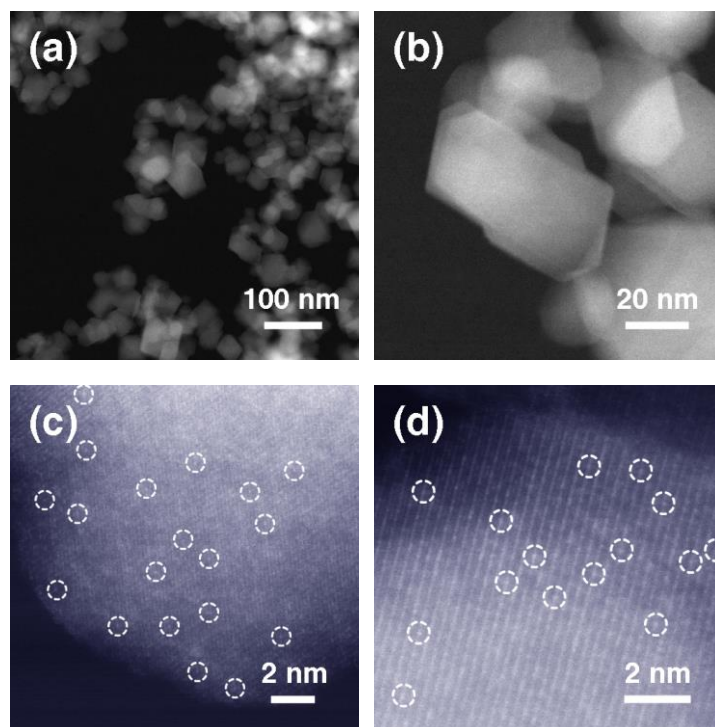

**Supplementary Figure 19. AC-HAADF-STEM images of Ru/MAFO-500-AR(800) sample.**

AC-HAADF-STEM images of Ru/MAFO-500-AR(800) sample with relatively low magnifications (a, b) and relatively high magnifications (c, d).

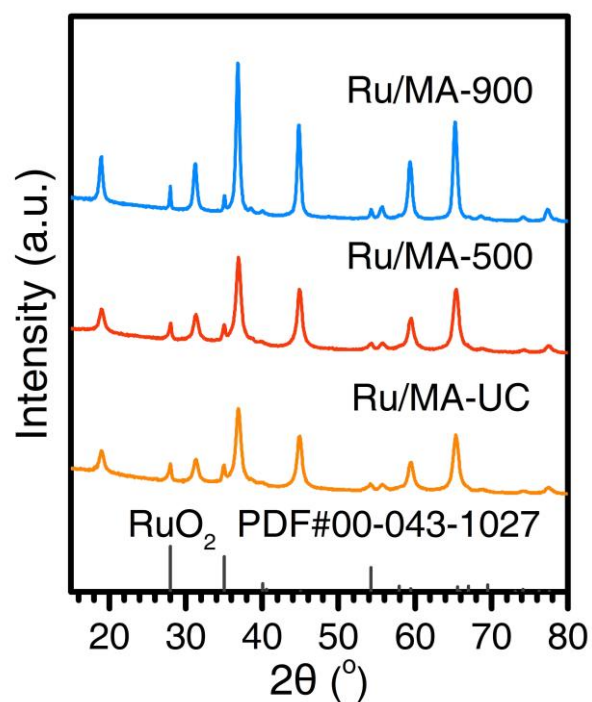

**Supplementary Figure 20. XRD patterns of Ru/MA samples calcined at different temperatures and reference materials.**

The XRD characterization showed that RuO<sub>2</sub> aggregates were not dispersed into isolated atoms over the MA support by high temperature calcination, but rather underwent sintering resulting in sharper RuO<sub>2</sub> reflections.

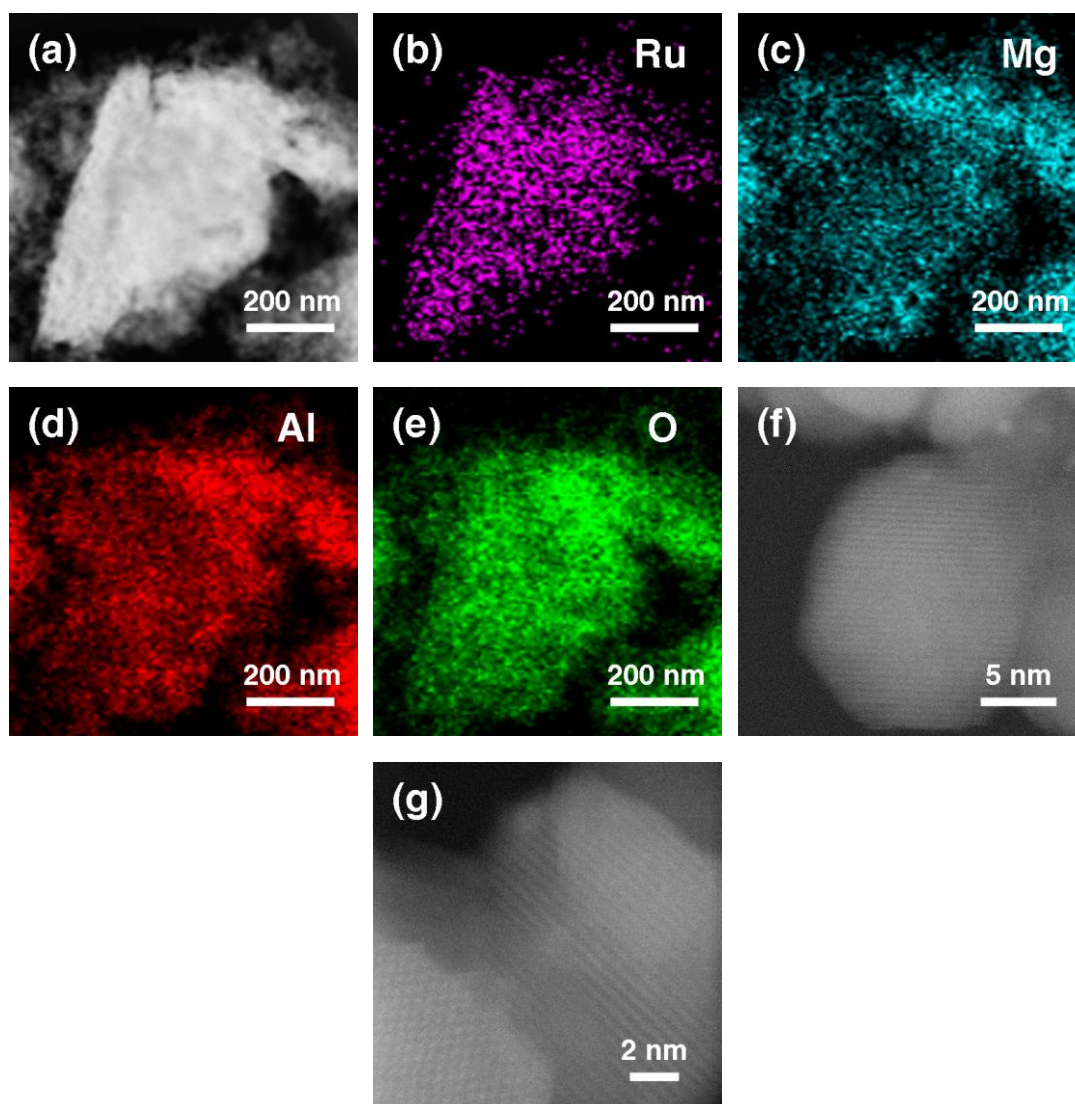

**Supplementary Figure 21. AC-HAADF-STEM characterization of Ru/MA-900 sample.**

AC-HAADF-STEM images of Ru/MA-900 sample with relatively low magnification (a) and relatively high magnifications (f, g), and corresponding energy dispersive X-ray spectroscopy element mapping images of Ru (b), Mg (c), Al (d) and O (e) of image (a). (a) shows very large RuO<sub>2</sub> aggregates and (f, g) show the presence of a few small RuO<sub>2</sub> nanoparticles or nanoclusters.

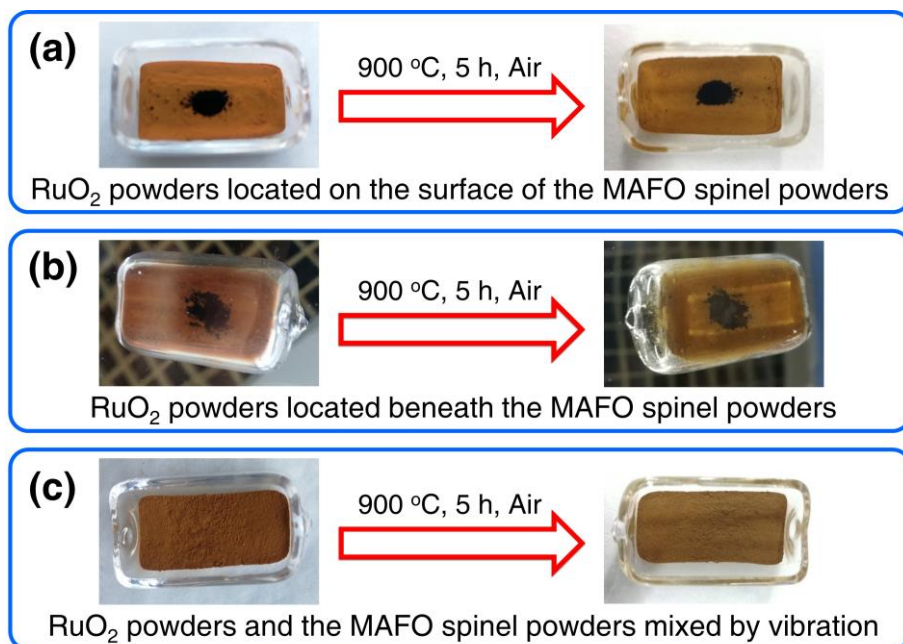

**Supplementary Figure 22. Photographs of three control experiments with different contact manners of RuO<sub>2</sub> powders and MAFO support before and after calcination.**

RuO<sub>2</sub> powders were located on the surface of (a) or underneath (b) the MAFO powders, or randomly mixed with the MAFO by vibration (c).

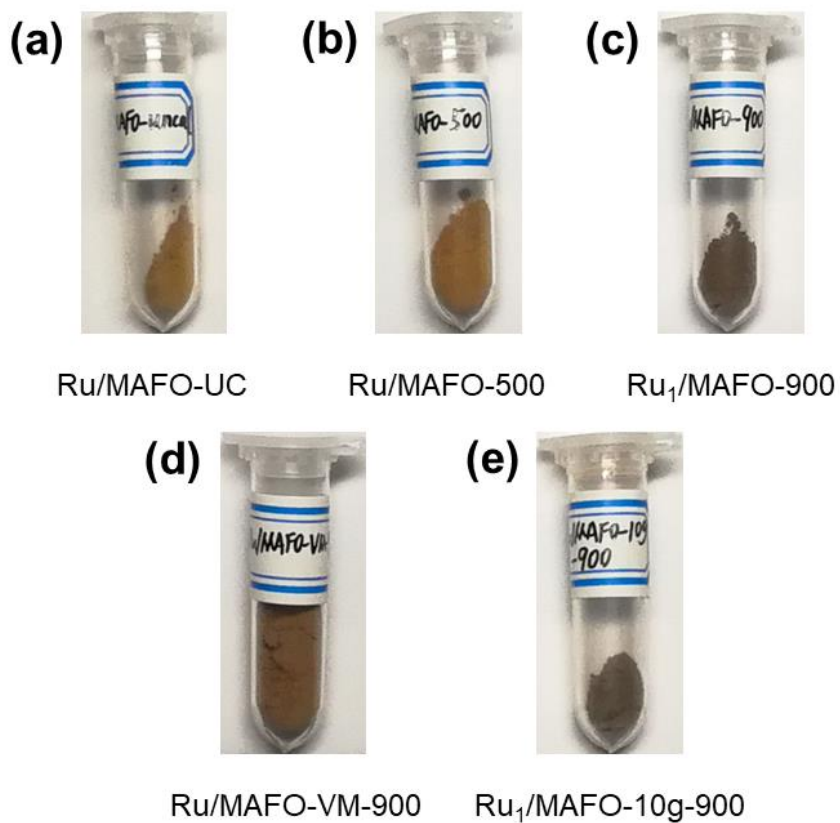

**Supplementary Figure 23. Photographs of different Ru/MAFO samples.**

Photographs of Ru/MAFO-UC (a), Ru/MAFO-500 (b), Ru<sub>1</sub>/MAFO-900 (c), Ru/MAFO-VM-900 (d) and Ru<sub>1</sub>/MAFO-10g-900 (e) samples.



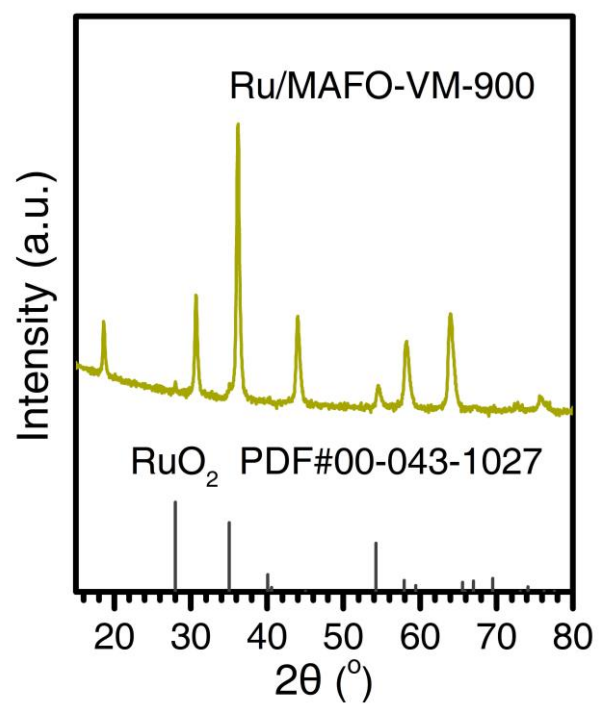

**Supplementary Figure 24. XRD pattern of Ru/MAFO-VM-900 sample (VM = vibration mixing) and reference materials.**

Obvious RuO<sub>2</sub> diffraction peaks were observed for Ru/MAFO-VM-900 sample, indicating that RuO<sub>2</sub> cannot be completely dispersed on this sample.

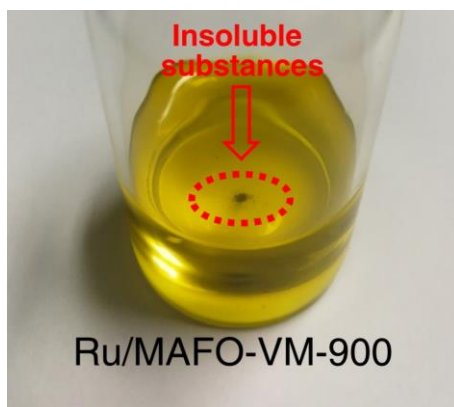

**Supplementary Figure 25. Photograph of Ru/MAFO-VM-900 sample after being dissolved in aqua regia by heating on a hotplate for 2 h.**

Some black insoluble substances remained in Ru/MAFO-VM-900 sample which were undispersed RuO<sub>2</sub> aggregates.

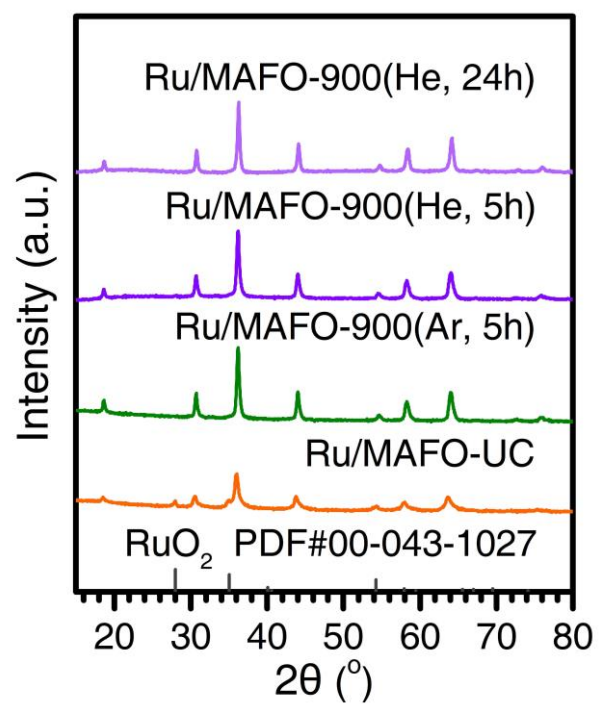

**Supplementary Figure 26. XRD patterns of Ru/MAFO-900(Ar/He, 5h) and Ru/MAFO-900(He, 24h) samples and reference materials.**

The XRD characterization confirmed the loss of RuO<sub>2</sub> reflections consistent with at least partial Ru dispersion.

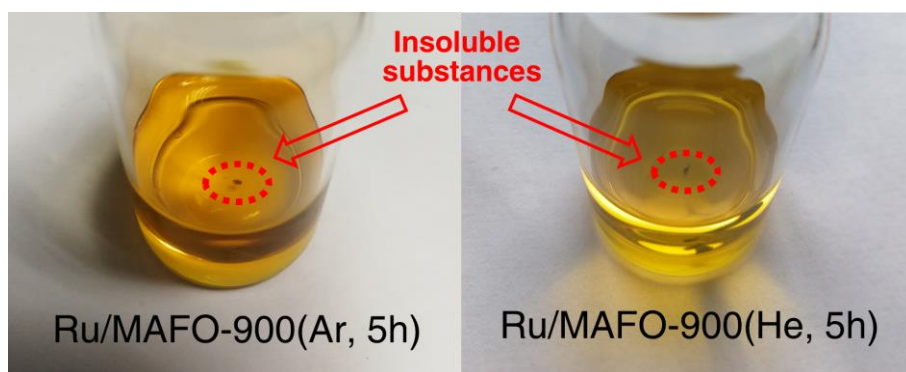

**Supplementary Figure 27. Photographs of Ru/MAFO-900(He/Ar, 5h) samples after being dissolved in aqua regia by heating on a hotplate for 2 h.**

Only trace black insoluble substances remained in Ru/MAFO-900(He/Ar, 5h) samples.

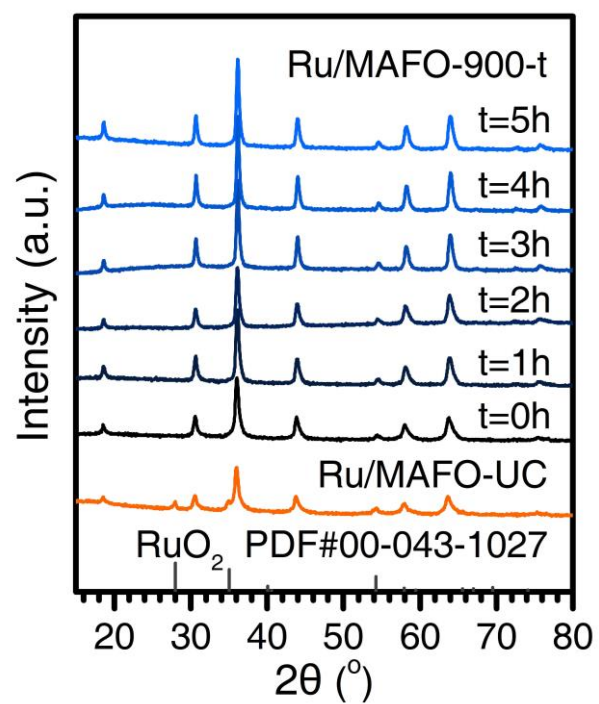

**Supplementary Figure 28. XRD patterns of Ru/MAFO-900 calcined at different times, denoted as Ru/MAFO-900-t where  $t = 0 - 5$  h, and reference materials.**

The XRD characterization showed the loss of RuO<sub>2</sub> reflections for Ru/MAFO-900 calcined at different times.

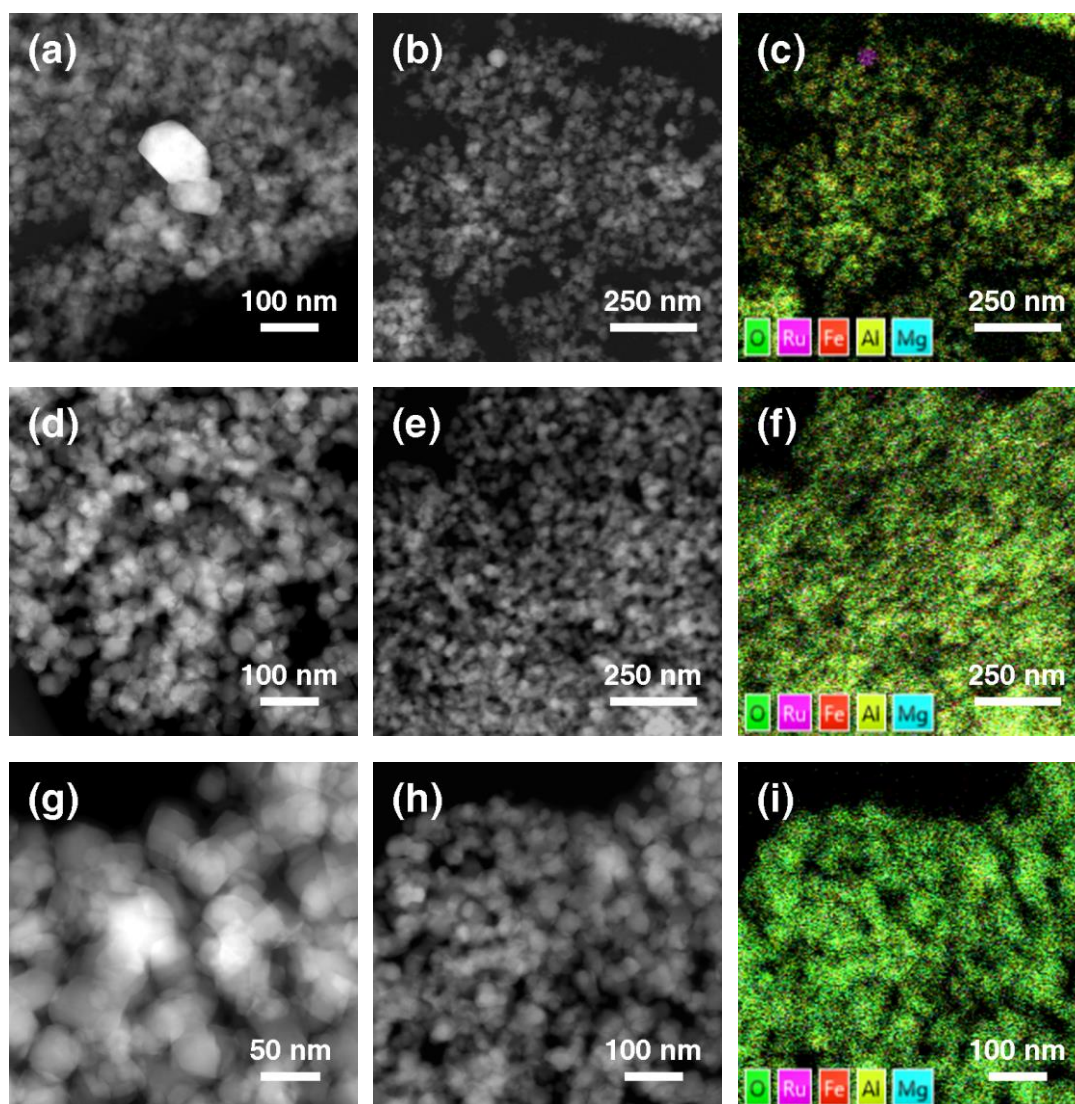

**Supplementary Figure 29. HAADF-STEM characterization of Ru/MAFO-900-t samples.**

HAADF-STEM images of Ru/MAFO-900-0h (a, b), Ru/MAFO-900-1h (d, e), Ru/MAFO-900-3h (g, h), and corresponding energy dispersive X-ray spectroscopy element mapping images (c), (f) and (i), respectively.

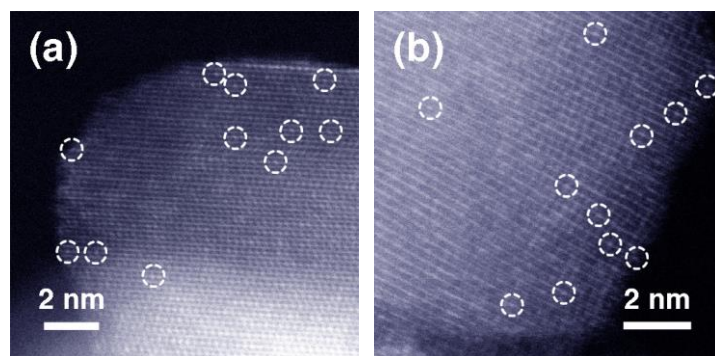

**Supplementary Figure 30. AC-HAADF-STEM images of Ru/MAFO-900-1h sample.**

AC-HAADF-STEM images of Ru/MAFO-900-1h sample with relatively high magnifications (a, b).

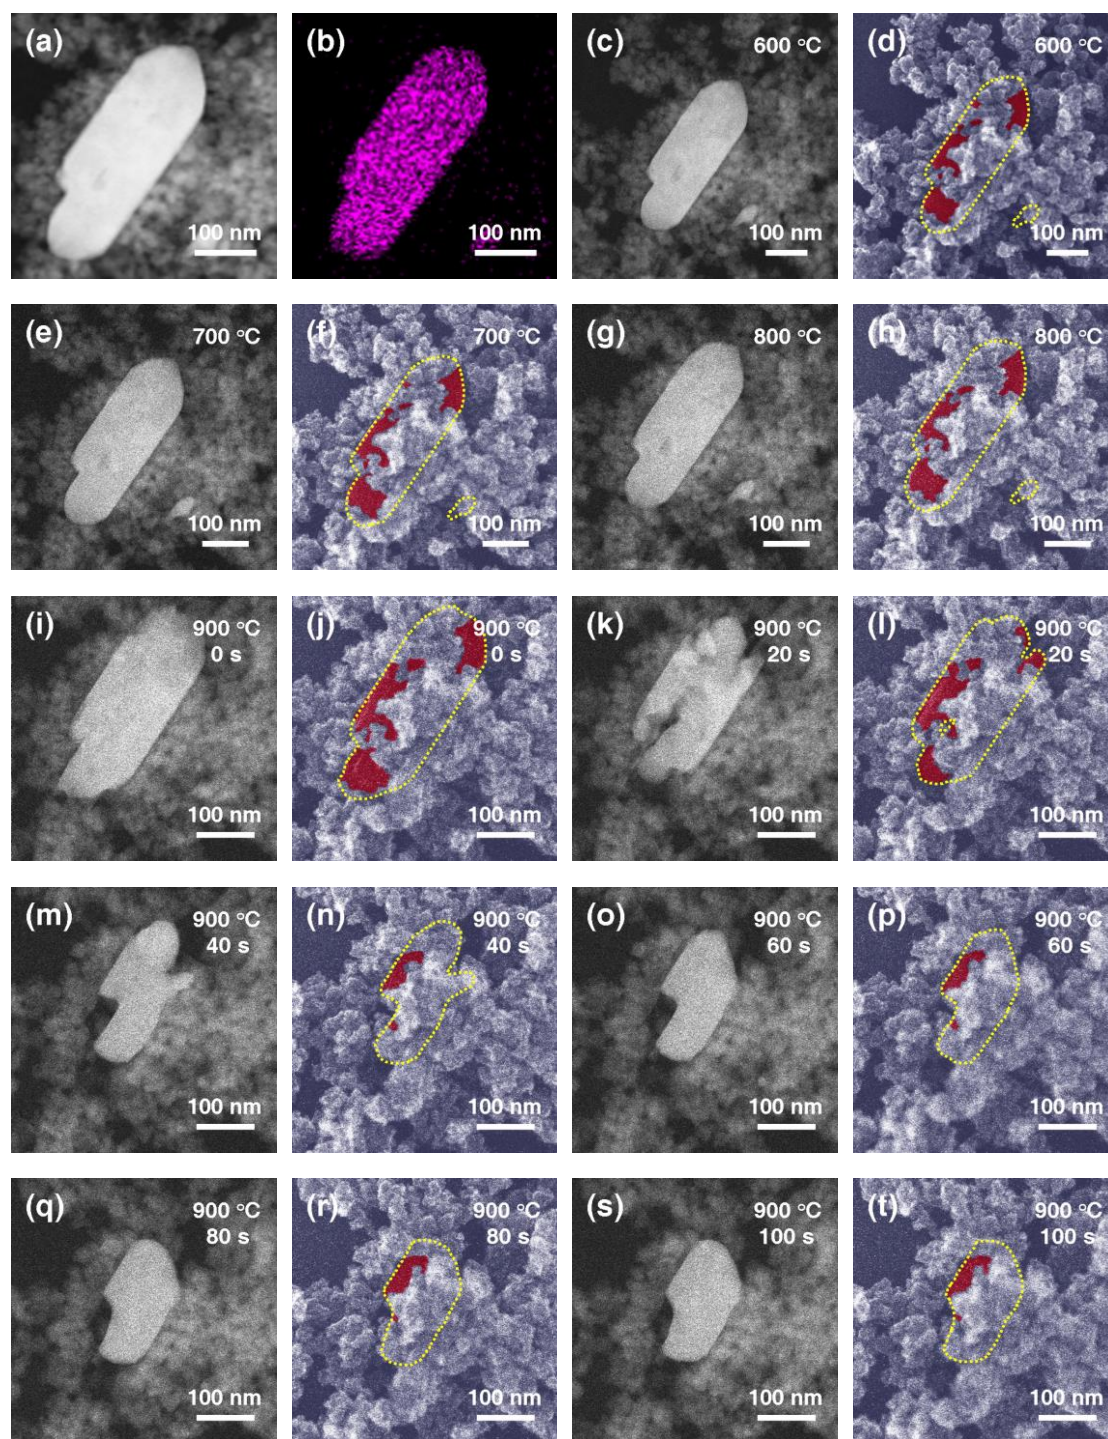

**Supplementary Figure 31. In situ characterization of RuO<sub>2</sub> dispersion (first time).**

AC-HAADF-STEM image of Ru/MAFO-UC sample (a) and corresponding energy dispersive X-ray spectroscopy element mapping image of Ru (b). In situ AC-HAADF-STEM images (c, e, g, i, k, m, o, q, s) and corresponding SE images (d, f, h, j, l, n, p, r, t) of a RuO<sub>2</sub>+MAFO physical mixture after calcination at 600, 700 and 800 °C and at 900 °C for



different time under flowing O<sub>2</sub> (2 mL min<sup>-1</sup> and 3.5 Pa). Yellow dashed lines in the SE images silhouette the RuO<sub>2</sub> aggregate, and red regions indicate exposed RuO<sub>2</sub> surfaces.

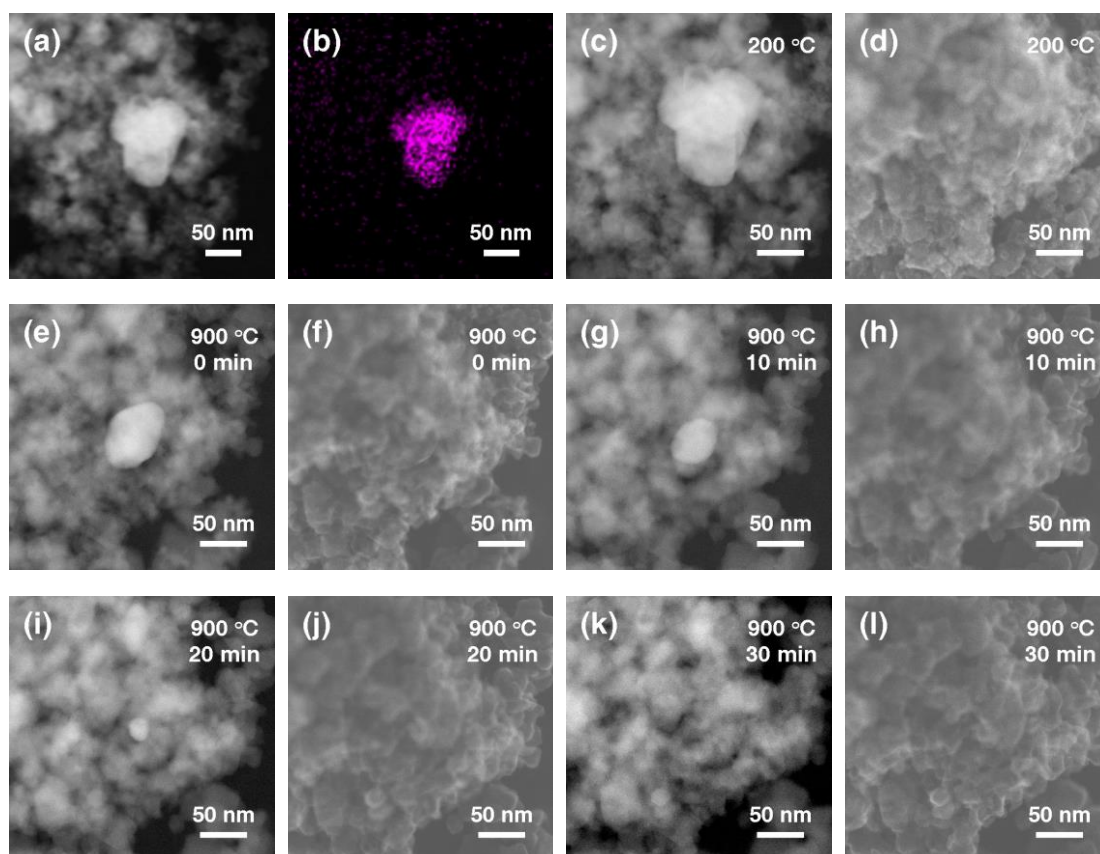

**Supplementary Figure 32. In situ characterization of RuO<sub>2</sub> dispersion (second time).**

AC-HAADF-STEM image of Ru/MAFO-UC sample (a) and corresponding energy dispersive X-ray spectroscopy element mapping image of Ru (b). In situ AC-HAADF-STEM images (c, e, g, i, k) and corresponding SE images (d, f, h, j, l) of a RuO<sub>2</sub>+MAFO physical mixture after calcination at 200 and at 900 °C for different time under flowing O<sub>2</sub> (2 mL min<sup>-1</sup> and 3.5 Pa).

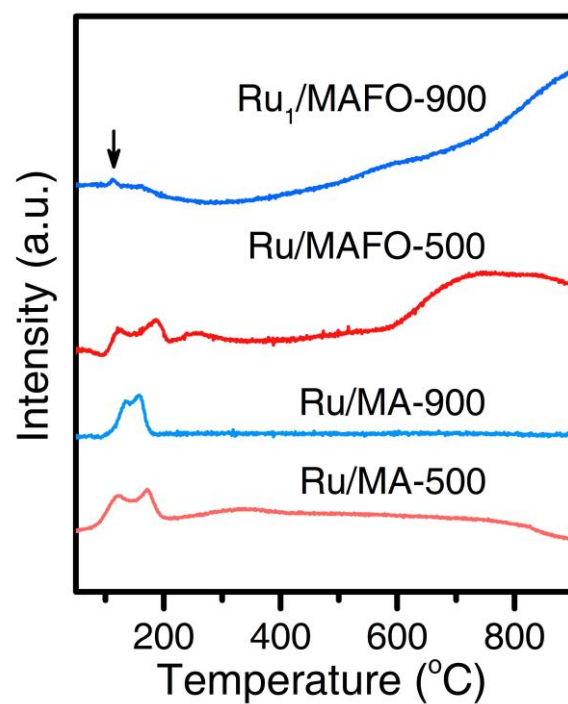

**Supplementary Figure 33. H<sub>2</sub>-TPR profiles of Ru/MAFO and Ru/MA samples.**

On Ru/MA-500, Ru/MA-900 and Ru/MAFO-500 samples two reduction peaks were observed between 100 and 200 °C. Differently, the low-temperature reduction of Ru nearly vanished on the Ru<sub>1</sub>/MAFO-900 sample with only a very tiny reduction peak (marked by arrow).

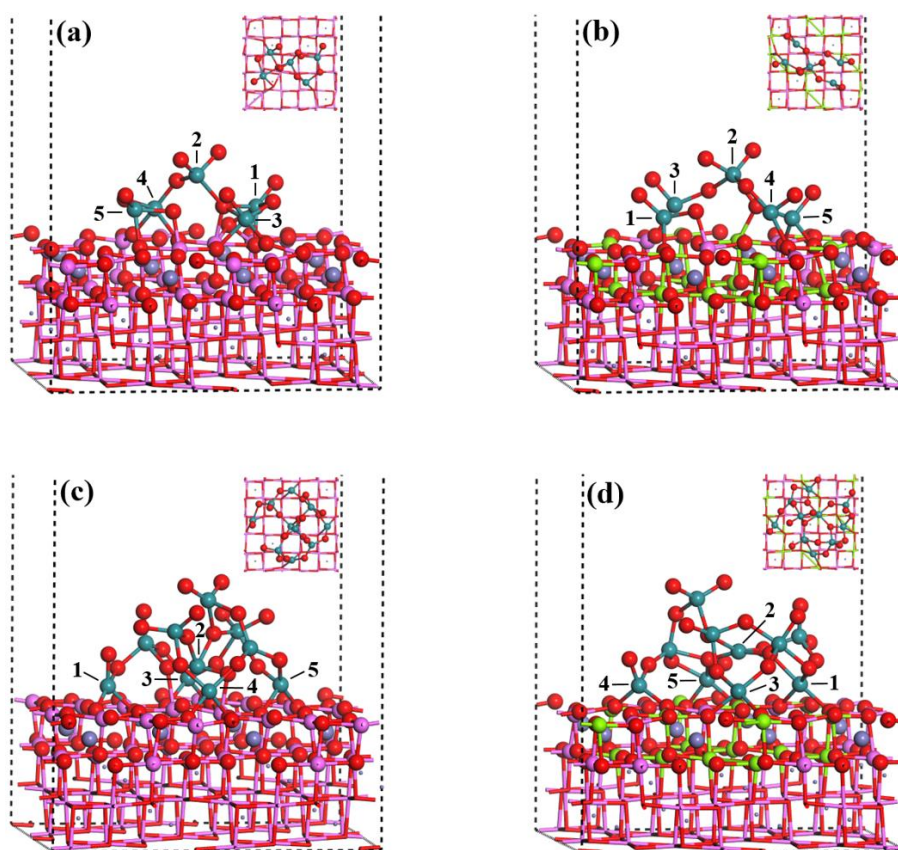

**Supplementary Figure 34. DFT calculations.**

Optimized structures for the  $\text{Ru}_5\text{O}_{10}$  cluster on  $\text{MgAl}_2\text{O}_4(100)$  surface (a) and Fe-substituted  $\text{MgAl}_2\text{O}_4(100)$  surface (b) and the  $\text{Ru}_{10}\text{O}_{20}$  cluster on  $\text{MgAl}_2\text{O}_4(100)$  surface (c) and Fe-substituted  $\text{MgAl}_2\text{O}_4(100)$  surface (d). In Fe-substituted  $\text{MgAl}_2\text{O}_4(100)$  model (b and d), Al atoms in top two layers of  $\text{MgAl}_2\text{O}_4(100)$  were partly substituted by Fe atoms. The Ru, O, Mg, Al, and Fe atoms are colored by blue, red, grey, pink, and green, respectively.

After optimization both clusters are obviously dispersed on Fe substituted MAFO support compared with on MA support. To further measure the dispersion magnitude, the distance between those four Ru atoms (#1, 3, 4, 5) and the Ru (#2) which could be viewed as the center of the cluster are summarized in Supplementary Table 6. For both clusters either the longest or the average Ru–Ru distance increased obviously. In particular, on the basis of the longest or the average Ru–Ru distance values for the large  $\text{Ru}_{10}\text{O}_{20}$  cluster in models c and d,

the large cluster is easier to be dispersed by the substituted Fe. These results clearly revealed that the interaction between MAFO and RuO<sub>2</sub> comes from the substituted Fe atoms that are able to promote the dispersion of RuO<sub>2</sub> cluster.

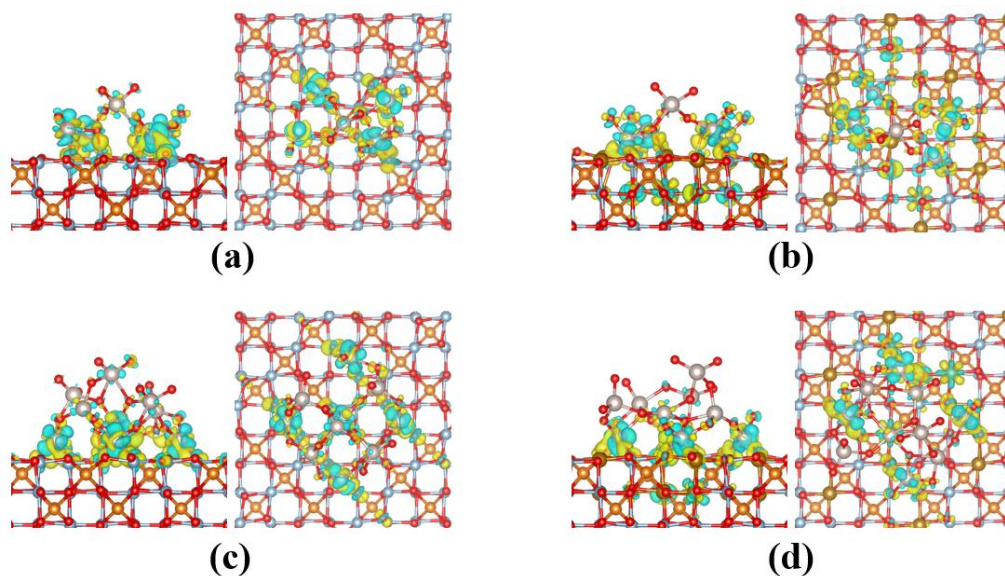

**Supplementary Figure 35. Electron density difference maps.**

Electron density difference maps (isovalue = 0.009) for the Ru<sub>5</sub>O<sub>10</sub> cluster on MgAl<sub>2</sub>O<sub>4</sub>(100) surface (a) and Fe-substituted MgAl<sub>2</sub>O<sub>4</sub>(100) surface (b) and the Ru<sub>10</sub>O<sub>20</sub> cluster on MgAl<sub>2</sub>O<sub>4</sub>(100) surface (c) and Fe-substituted MgAl<sub>2</sub>O<sub>4</sub>(100) surface (d). The charge depletion and accumulation regions are shown in blue and yellow, respectively.

The electron density difference, which is defined by the difference between the electron density of the RuO<sub>2</sub>-cluster/surface system and the sum of the electron density of the deformed surface and a deformed isolated RuO<sub>2</sub> cluster, have been calculated. By comparing the models a (or c) and b (or d), it is clear that even the Fe in the second layer of models b (or d) also participate the charge transfer between the surface and cluster, revealing the Fe substitution effect on the interaction between the surface and cluster.

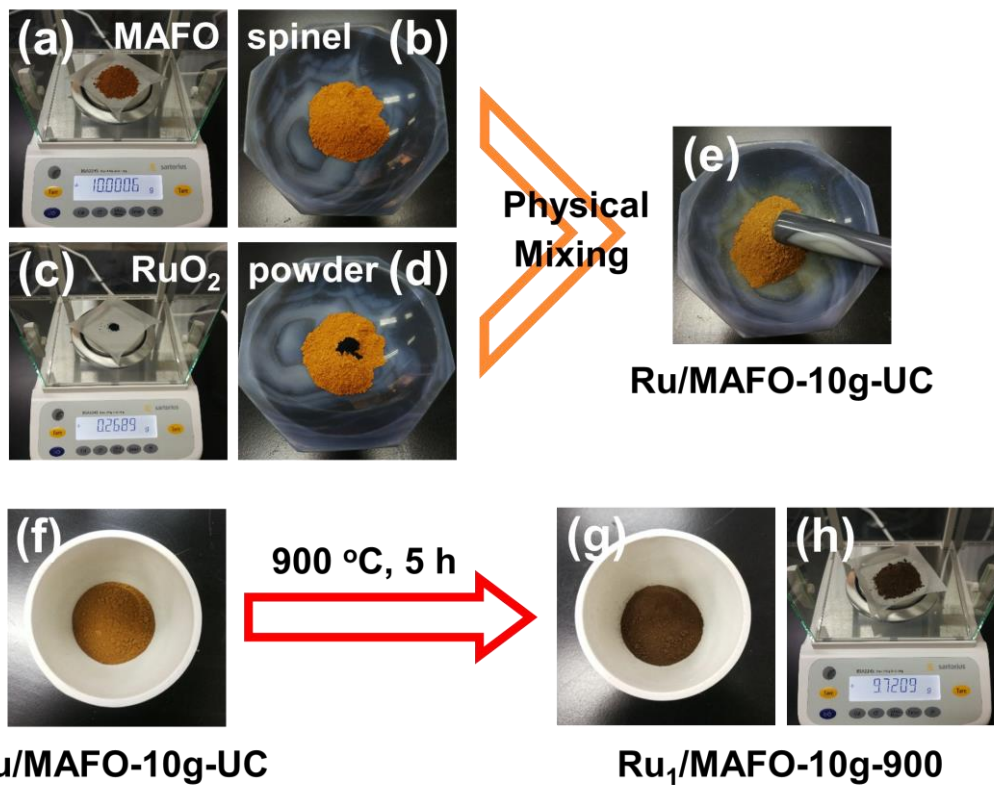

**Supplementary Figure 36. Photographs of each step in 10-gram-scale preparation of Ru SAC (Ru<sub>1</sub>/MAFO-10g-900).**

Photographs of MAFO spinel (a, b), RuO<sub>2</sub> powder (c, d), Ru/MAFO-10g-UC (e, f), UC = uncalcined and Ru<sub>1</sub>/MAFO-10g-900 (g, h).

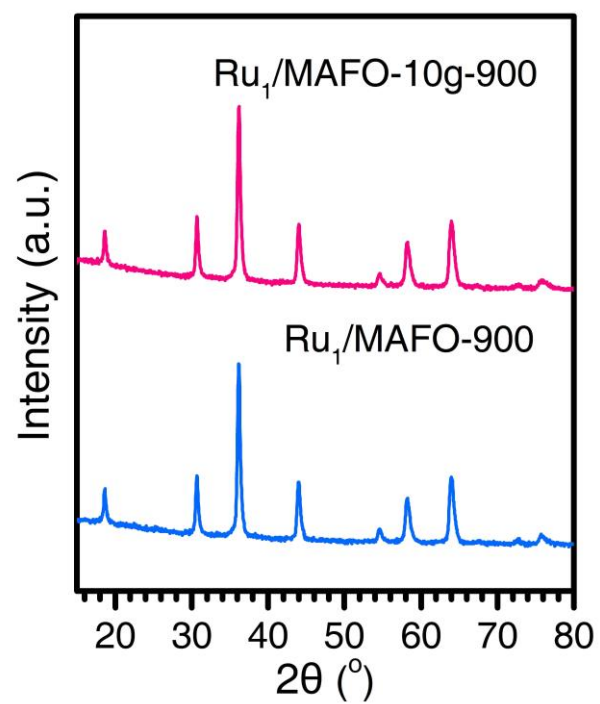

**Supplementary Figure 37. XRD patterns of Ru<sub>1</sub>/MAFO-10g-900 and Ru<sub>1</sub>/MAFO-900 samples.**

No RuO<sub>2</sub> diffraction peaks were observed for Ru<sub>1</sub>/MAFO-10g-900 sample, indicating a successful scale up.



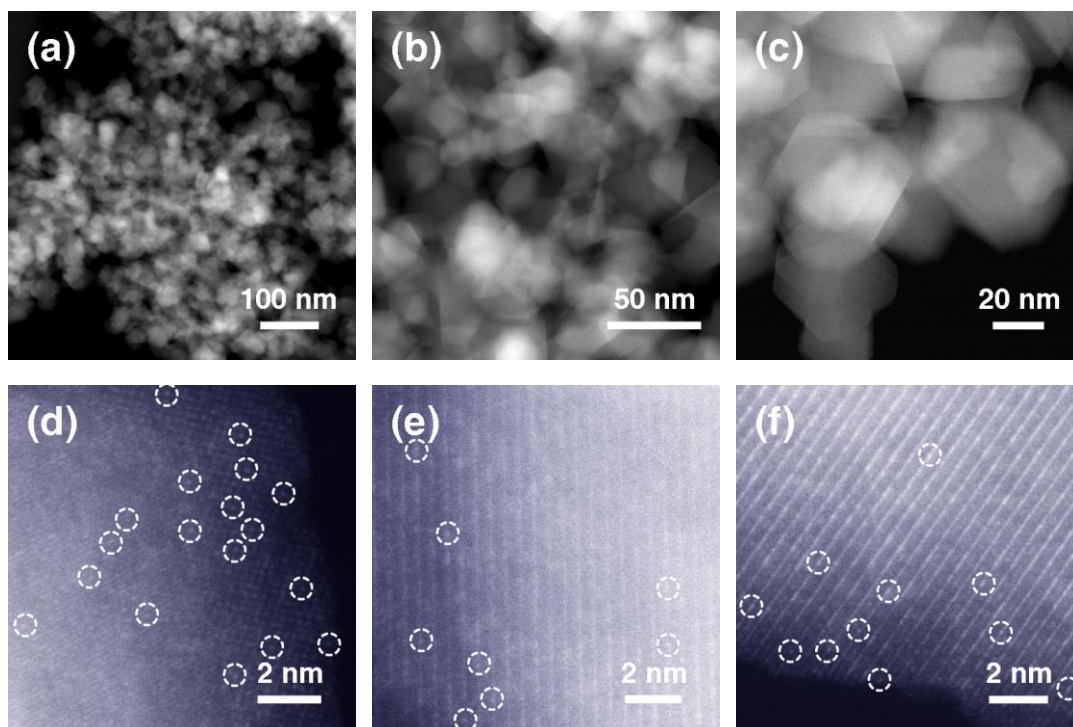

**Supplementary Figure 38. HAADF-STEM images of Ru<sub>1</sub>/MAFO-10g-900 sample.**

HAADF-STEM images (a, b) and AC-HAADF-STEM images (c-f) of Ru<sub>1</sub>/MAFO-10g-900 sample.

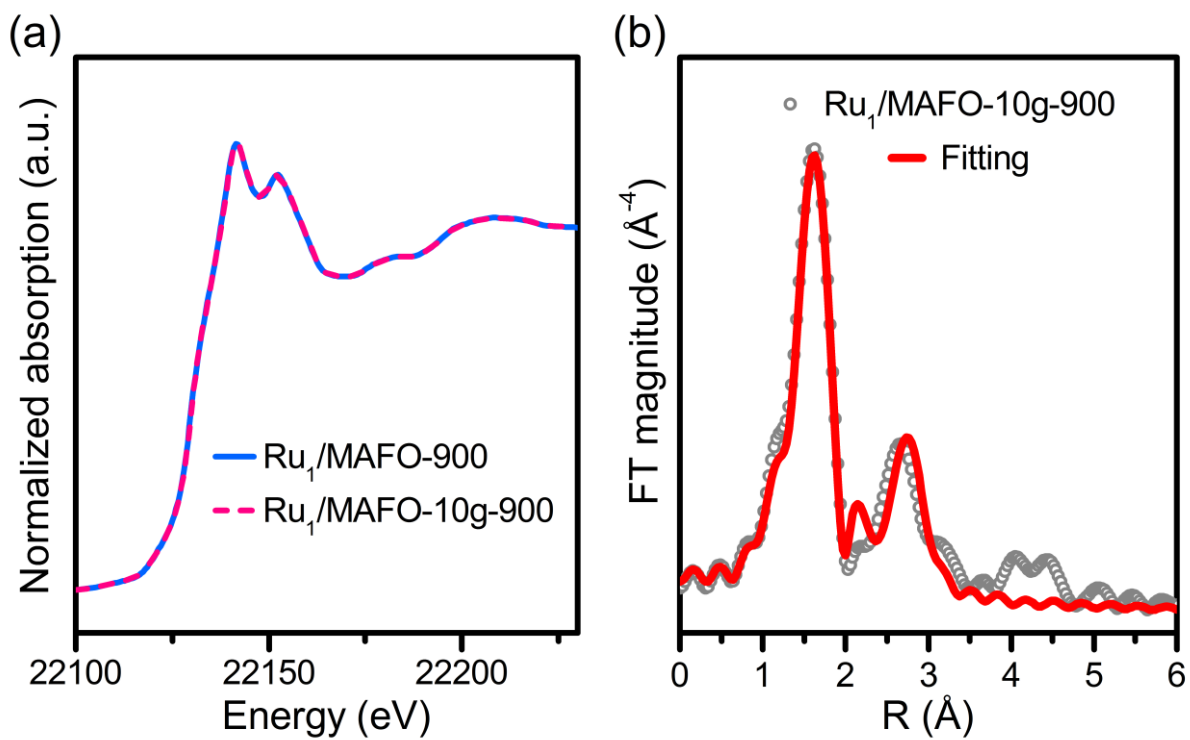

**Supplementary Figure 39. EXAFS characterization of Ru<sub>1</sub>/MAFO-10g-900 sample.**

Normalized Ru K-edge XANES for Ru<sub>1</sub>/MAFO-10g-900 and Ru<sub>1</sub>/MAFO-900 samples (a) and experimental and fitted Fourier transforms at Ru K-edge EXAFS of Ru<sub>1</sub>/MAFO-10g-900 (b).

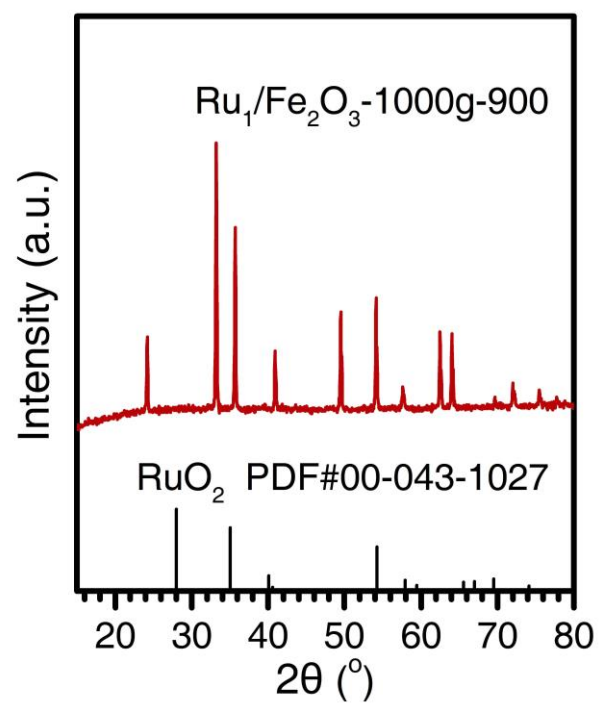

**Supplementary Figure 40. XRD pattern of Ru<sub>1</sub>/Fe<sub>2</sub>O<sub>3</sub>-1000g-900 sample and reference materials.**

No RuO<sub>2</sub> diffraction peaks were observed for Ru<sub>1</sub>/Fe<sub>2</sub>O<sub>3</sub>-1000g-900 sample.

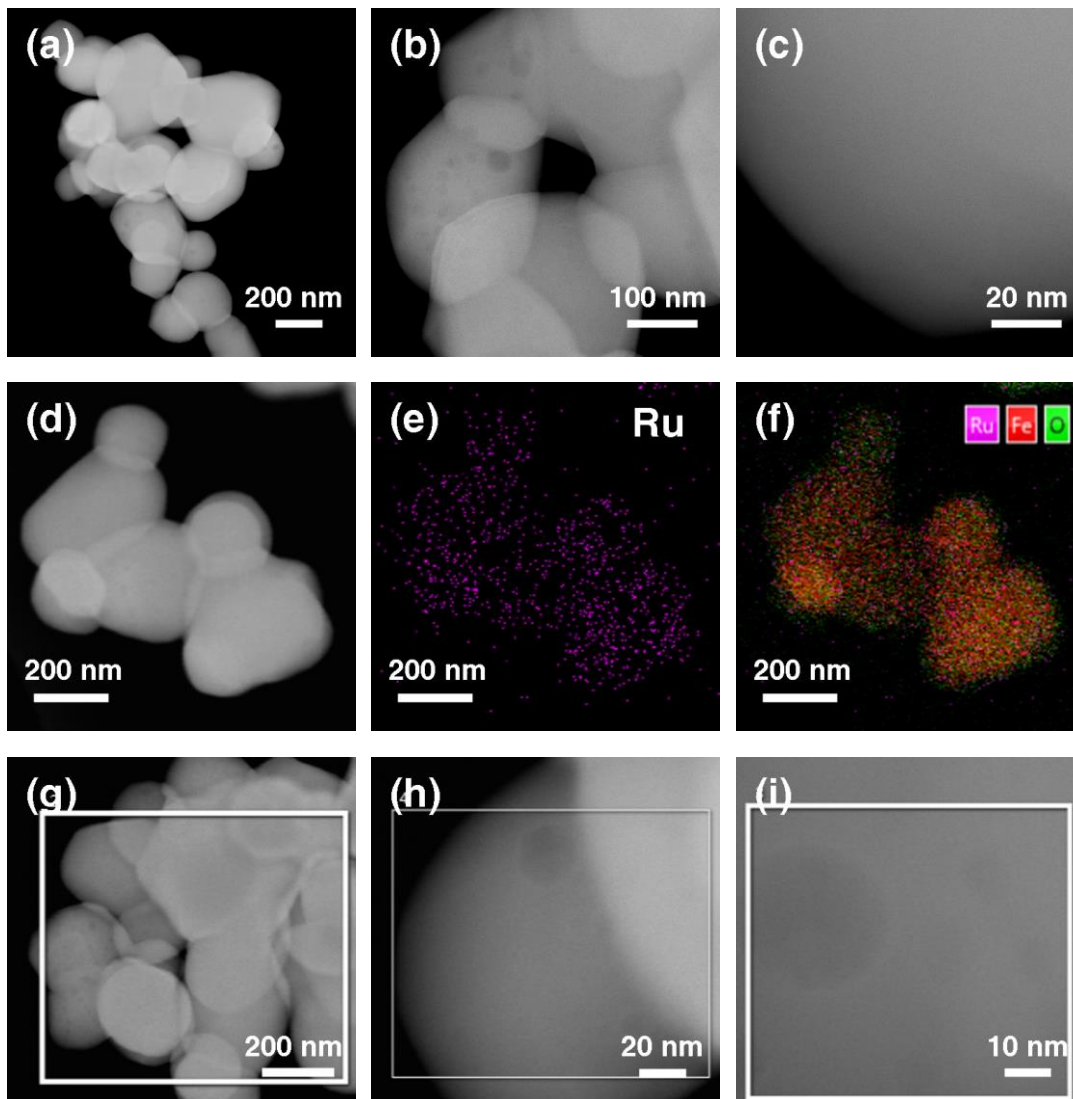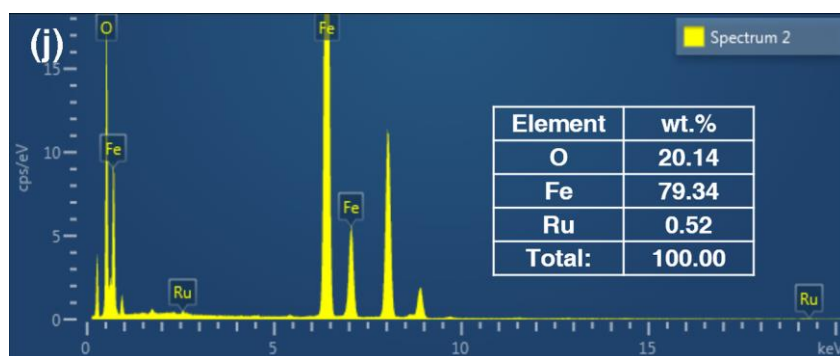

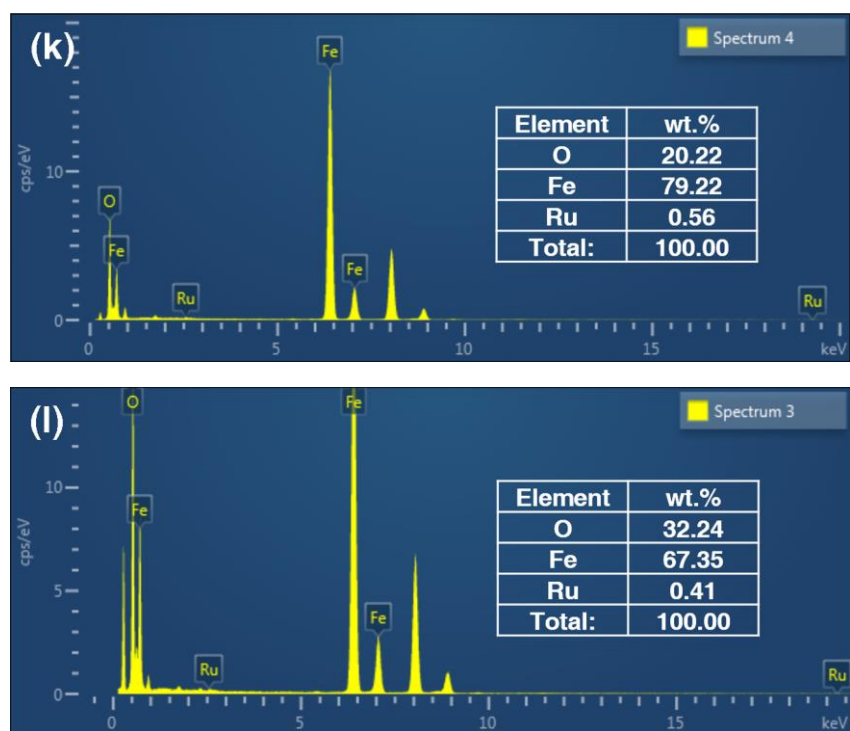

**Supplementary Figure 41. HAADF-STEM characterization of Ru<sub>1</sub>/Fe<sub>2</sub>O<sub>3</sub>-1000g-900 sample.**

HAADF-STEM images of Ru<sub>1</sub>/Fe<sub>2</sub>O<sub>3</sub>-1000g-900 sample (a-d, g-i), corresponding energy dispersive X-ray spectroscopy element mapping images of Ru (e) and Ru + Fe + O (f) of image (d), and corresponding weight percent of O, Fe, Ru in the selected areas of images (g, h, i) by energy dispersive X-ray analysis (j, k, l), respectively.

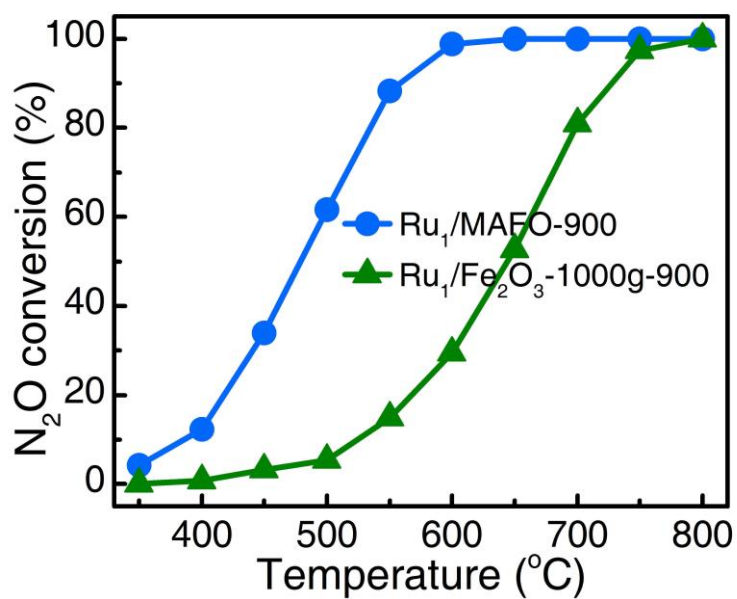

**Supplementary Figure 42. N<sub>2</sub>O conversion as a function of reaction temperature on Ru<sub>1</sub>/MAFO-900 and Ru<sub>1</sub>/Fe<sub>2</sub>O<sub>3</sub>-1000g-900 SACs at low concentration (1000 ppm N<sub>2</sub>O, Ar balance).**

Reaction conditions: 100 mg Ru<sub>1</sub>/MAFO-900 catalyst or 670 mg Ru<sub>1</sub>/Fe<sub>2</sub>O<sub>3</sub>-1000g-900 catalyst; gas flow, 33.3 mL min<sup>-1</sup>.

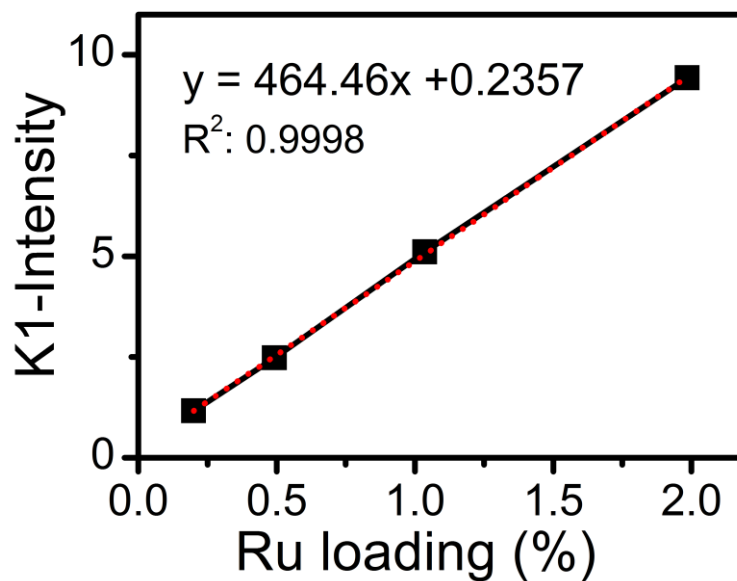

**Supplementary Figure 43. Ru content - XRF K1 intensity calibration curve.**

We prepared a XRF calibration curve to obtain an accurate Ru content of Ru/MAFO samples. Briefly, 2.5 g of MAFO spinel was physically mixed with corresponding proportion of RuO<sub>2</sub> by using an agate mortar.

**Supplementary Table 1. Physicochemical properties of the spinel and catalysts.**

| Sample                                                       | Surface area<br>(m <sup>2</sup> g <sup>-1</sup> ) | Pore volume<br>(cm <sup>3</sup> g <sup>-1</sup> ) | Average pore size<br>(nm) |
|--------------------------------------------------------------|---------------------------------------------------|---------------------------------------------------|---------------------------|
| MAFO (MgAl <sub>1.2</sub> Fe <sub>0.8</sub> O <sub>4</sub> ) | 109                                               | 0.34                                              | 10                        |
| Ru/MAFO-500                                                  | 85                                                | 0.23                                              | 9                         |
| Ru <sub>1</sub> /MAFO-900                                    | 38                                                | 0.21                                              | 18                        |
| MgAl <sub>1.5</sub> Fe <sub>0.5</sub> O <sub>4</sub>         | 132                                               | 0.36                                              | 8                         |
| MgAl <sub>1</sub> Fe <sub>1</sub> O <sub>4</sub>             | 99                                                | 0.37                                              | 13                        |
| MgAl <sub>0.5</sub> Fe <sub>1.5</sub> O <sub>4</sub>         | 36                                                | 0.15                                              | 15                        |
| Ru <sub>1</sub> /Fe <sub>2</sub> O <sub>3</sub> -1000g-900   | 4                                                 | 0.01                                              | 13                        |



**Supplementary Table 2. Ru loadings of samples measured by XRF and ICP-OES.**

| Sample                                                     | Ru loading measured<br>by XRF<br>(wt%) | Ru loading measured<br>by ICP-OES<br>(wt%) |
|------------------------------------------------------------|----------------------------------------|--------------------------------------------|
| Ru/MAFO-500                                                | 2.10                                   | 0.50                                       |
| Ru <sub>1</sub> /MAFO-900                                  | 2.08                                   | 2.09                                       |
| Ru <sub>1</sub> /MAFO-10g-900                              | 2.09                                   | -                                          |
| Ru <sub>1</sub> /MAFO-900-AR(550)                          | -                                      | 2.02                                       |
| Ru/MAFO-VM-900                                             | -                                      | 0.72                                       |
| Ru/MAFO-900(Ar, 5h)                                        | -                                      | 1.62                                       |
| Ru/MAFO-900(He, 5h)                                        | -                                      | 1.66                                       |
| Ru/MAFO-900(He, 24h)                                       | -                                      | 1.98                                       |
| Ru <sub>1</sub> /Fe <sub>2</sub> O <sub>3</sub> -1000g-900 | -                                      | 0.31                                       |

**Supplementary Table 3. Fitting results of Ru K-edge EXAFS spectra for various samples.**

| Sample                        | Shell   | N    | R<br>(Å) | $\sigma^2 \times 10^2$<br>(Å <sup>2</sup> ) | $\Delta E_0$<br>(eV) | R-space<br>range (Å) | r-factor<br>(%) |
|-------------------------------|---------|------|----------|---------------------------------------------|----------------------|----------------------|-----------------|
| Ru Foil                       | Ru-Ru   | 12.0 | 2.67     | 0.3                                         | 6.0                  | 1.0-2.7              | 0.01            |
| RuO <sub>2</sub>              | Ru-O    | 5.8  | 1.97     | 0.4                                         | 10.6                 | 1.0-3.7              | 0.4             |
|                               | Ru-O-Ru | 2.0  | 3.09     | 0.5                                         | 5.1                  |                      |                 |
|                               | Ru-O-Ru | 8.0  | 3.54     | 0.5                                         | 5.1                  |                      |                 |
| Ru/MAFO-500                   | Ru-O    | 5.1  | 1.98     | 0.4                                         | 11.7                 | 1.0-3.7              | 0.3             |
|                               | Ru-O-Ru | 1.4  | 3.09     | 0.3                                         | 5.1                  |                      |                 |
|                               | Ru-O-Ru | 5.7  | 3.54     | 0.5                                         | 5.1                  |                      |                 |
| Ru <sub>1</sub> /MAFO-900     | Ru-O    | 5.0  | 2.02     | 0.5                                         | 14.7                 | 1.0-3.2              | 0.03            |
|                               | Ru-Fe   | 5.4  | 3.06     | 1.3                                         | 2.7                  |                      |                 |
| Ru <sub>1</sub> /MAFO-10g-900 | Ru-O    | 5.0  | 2.01     | 0.4                                         | 13.6                 | 1.0-3.2              | 0.03            |
|                               | Ru-Fe   | 5.4  | 3.06     | 1.3                                         | 2.9                  |                      |                 |

N, the coordination number for the absorber-backscatterer pair; R, the average absorber-backscatterer distance;  $\sigma^2$ , the Debye-Waller factor;  $\Delta E_0$ , the inner potential correction. The accuracies of the above parameters were estimated as N,  $\pm 20\%$ ; R,  $\pm 1\%$ ;  $\sigma^2$ ,  $\pm 20\%$ ;  $\Delta E_0$ ,  $\pm 20\%$ . The data range used for data fitting in k-space ( $\Delta k$ ) is 3.5-12.8 Å<sup>-1</sup>.

**Supplementary Table 4. Weight loss rate of RuO<sub>2</sub> under different conditions.**

| Entry | Type of furnace | Atmosphere | Time (h) | Weight loss rate (%) |
|-------|-----------------|------------|----------|----------------------|
| 1     | Muffle          | Air        | 5        | 4.6                  |
| 2     | Tube            | Air        | 5        | 8.4                  |
| 3     | Tube            | Ar         | 24       | 5.0                  |

**Supplementary Table 5. H<sub>2</sub> consumptions of Ru/MAFO and Ru/MA samples based on H<sub>2</sub>-TPR.**

| Sample                    | H <sub>2</sub> consumption<br>( $\mu\text{mol/g}_{\text{cat}}$ ) | Corresponding amount of<br>reduced Ru<br>(wt%) |
|---------------------------|------------------------------------------------------------------|------------------------------------------------|
| Ru/MA-500                 | 437.1                                                            | 2.21                                           |
| Ru/MA-900                 | 342.3                                                            | 1.73                                           |
| Ru/MAFO-500               | 356.3                                                            | 1.80                                           |
| Ru <sub>1</sub> /MAFO-900 | 14.5                                                             | 0.07                                           |

Considering that Ru existed in the form of Ru<sup>4+</sup> and the weight loadings of samples were 2 wt%, thus the theoretical H<sub>2</sub> consumption for all samples is 395.8  $\mu\text{mol/g}$ .

**Supplementary Table 6. The Ru–Ru(#2) distances (in Å) in different models in supplementary Fig. 34.**

| Cluster          | Ru <sub>5</sub> O <sub>10</sub> |              |           | Ru <sub>10</sub> O <sub>20</sub> |              |           |
|------------------|---------------------------------|--------------|-----------|----------------------------------|--------------|-----------|
| Models           | a                               | b            | Increment | c                                | d            | Increment |
| Ru(#1)–Ru(#2)    | <b>3.920</b>                    | <b>4.074</b> |           | <b>4.513</b>                     | 3.565        |           |
| Ru(#3)–Ru(#2)    | 3.305                           | 3.620        |           | 4.207                            | 4.941        |           |
| Ru(#4)–Ru(#2)    | 3.477                           | 3.441        |           | 3.945                            | <b>5.542</b> |           |
| Ru(#5)–Ru(#2)    | 3.556                           | 3.610        |           | 4.252                            | 3.542        |           |
| Average distance | 3.565                           | 3.686        | 3.4%      | 4.229                            | 4.398        | 4.0%      |

**Supplementary Table 7. Binding energy  $E$  and reaction energy  $G$  of the farthest  $\text{RuO}_2$  dissociation at different temperatures.**

| Cluster              | $\text{Ru}_5\text{O}_{10}$ |       | $\text{Ru}_{10}\text{O}_{20}$ |       |
|----------------------|----------------------------|-------|-------------------------------|-------|
|                      | a                          | b     | c                             | d     |
| $E$ (eV, -273.15 °C) | 6.83                       | 5.87  | 9.56                          | 7.78  |
| $G$ (eV, -273.15 °C) | 1.13                       | 0.27  | 1.48                          | 0.61  |
| $G$ (eV, 800 °C)     | -1.89                      | -2.75 | -1.54                         | -2.41 |
| $G$ (eV, 900 °C)     | -2.23                      | -3.09 | -1.88                         | -2.76 |
| $G$ (eV, 1000 °C)    | -2.58                      | -3.44 | -2.24                         | -3.11 |

To further confirm that the MAFO could promote the formation of separated  $\text{RuO}_2$  molecule, the binding energy ( $E$ ) between the farthest  $\text{RuO}_2$  moiety and rest part were calculated. Moreover, the reaction Gibbs free energy ( $G$ ) of the farthest  $\text{RuO}_2$  dissociation was also calculated by using below chemical equations:

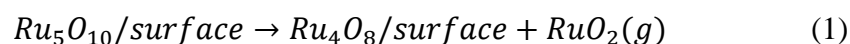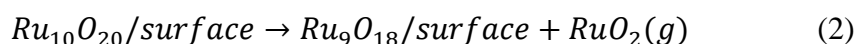

The entropy and enthalpy corrections to Gibbs free energy correction were calculated by taking into account the individual translational  $E_t$  and  $S_t$ , vibrational  $E_v$  and  $S_v$ , rotational  $E_r$  and  $S_r$ , and ZPE contributions. For slab models, the entropy and enthalpy corrections to free energies are neglected in this work.

Both the binding energy and reaction energy in models b and d are obviously lower than that in a and c, respectively, indicating that  $\text{RuO}_2$  moiety dissociation occurs easily on Fe-substituted  $\text{MgAl}_2\text{O}_4(100)$  surface. As the temperature rises to 800 °C, the  $\text{RuO}_2$

dissociation process has already become from endothermic to exothermic and the reaction Gibbs free energy in models b and d is still lower than that in a and c, respectively. These results revealed that RuO<sub>2</sub> dissociation from cluster on Fe-substituted MgAl<sub>2</sub>O<sub>4</sub>(100) surface is always thermodynamically preferred than that on MgAl<sub>2</sub>O<sub>4</sub>(100) surface, suggesting that the MAFO surface could facilitate the formation of single Ru atom.

**Supplementary Table 8. Ru content data and the corresponding K1 intensity.**

|   | RuO <sub>2</sub> (g) | MAFO (g) | Ru loading (%) | Ru K1-Intensity |
|---|----------------------|----------|----------------|-----------------|
| 1 | 0.0671               | 2.5009   | 1.98           | 9.431           |
| 2 | 0.0346               | 2.5036   | 1.04           | 5.108           |
| 3 | 0.0163               | 2.5002   | 0.49           | 2.477           |
| 4 | 0.0066               | 2.5013   | 0.20           | 1.167           |
