# Supplementary material for: Strong metal-support interaction promoted scalable production of thermally stable single-atom catalysts
Source: PubMed Central journal article supplement (PMC7062790; doi:10.1038/s41467-020-14984-9), 2020-03-09
Supplement: 41467_2020_14984_MOESM3_ESM.pdf [file 41467_2020_14984_MOESM3_ESM.pdf]

## **Description of Additional Supplementary Files**

File Name: Supplementary Movie 1

Description: In situ AC-HAADF-STEM/SEM characterization of RuO<sub>2</sub> dispersion
